# Supplementary material for: Identification of Antimicrobial Resistance-Associated Genes through Whole Genome Sequencing of Mycoplasma bovis Isolates with Different Antimicrobial Resistances
Source: MDPI journal article supplement (doi:10.3390/pathogens9070588), 2020-07-19
Supplement: s1 [file s1]

**Table S3: AMR-Associated Gene Candidates:**

| Functional Role:          | Gene:            | NSM Count  |             | Description:                                                              | Associated AMR:  | Reference:                                                                                                                                                                                                                                                                                                                                                           |
|---------------------------|------------------|------------|-------------|---------------------------------------------------------------------------|------------------|----------------------------------------------------------------------------------------------------------------------------------------------------------------------------------------------------------------------------------------------------------------------------------------------------------------------------------------------------------------------|
|                           |                  | 1982-M6152 | 2019-043682 |                                                                           |                  |                                                                                                                                                                                                                                                                                                                                                                      |
| Topoisomerases            | gyrA             | 0          | 8           | DNA gyrase subunit A                                                      | fluoroquinolones | Sulyok, K.M.; Kreizinger, Z.; Wehmann, E.; Lysnyansky, I.; Bányai, K.; Marton, S.; Jerzsele, Á.; Rónai, Z.; Turcsányi, I.; Makrai, L.; et al. Mutations Associated with Decreased Susceptibility to Seven Antimicrobial Families in Field and Laboratory-Derived Mycoplasma bovis Strains. Antimicrobial Agents and Chemotherapy 2017, 61, doi:10.1128/AAC.01983-16. |
|                           | gyrB             | 0          | 6           | type IIA DNA topoisomerase subunit B                                      | fluoroquinolones | Sulyok, K.M.; Kreizinger, Z.; Wehmann, E.; Lysnyansky, I.; Bányai, K.; Marton, S.; Jerzsele, Á.; Rónai, Z.; Turcsányi, I.; Makrai, L.; et al. Mutations Associated with Decreased Susceptibility to Seven Antimicrobial Families in Field and Laboratory-Derived Mycoplasma bovis Strains. Antimicrobial Agents and Chemotherapy 2017, 61, doi:10.1128/AAC.01983-16. |
|                           | parC             | 1*         | 19*         | DNA topoisomerase IV subunit A                                            | fluoroquinolones | Sulyok, K.M.; Kreizinger, Z.; Wehmann, E.; Lysnyansky, I.; Bányai, K.; Marton, S.; Jerzsele, Á.; Rónai, Z.; Turcsányi, I.; Makrai, L.; et al. Mutations Associated with Decreased Susceptibility to Seven Antimicrobial Families in Field and Laboratory-Derived Mycoplasma bovis Strains. Antimicrobial Agents and Chemotherapy 2017, 61, doi:10.1128/AAC.01983-16. |
|                           | parE             | 0          | 4           | DNA topoisomerase IV subunit B                                            | fluoroquinolones | Perichon, B.; Tankovic, J.; Courvalin, P. Characterization of a mutation in the parE gene that confers fluoroquinolone resistance in Streptococcus pneumoniae. Antimicrob. Agents Chemother. 1997, 41, 1166–1167, doi:10.1128/AAC.41.5.1166.                                                                                                                         |
|                           | topA             | 0          | 1^          | type I DNA topoisomerase                                                  |                  |                                                                                                                                                                                                                                                                                                                                                                      |
| <b>Protein Synthesis:</b> |                  |            |             |                                                                           |                  |                                                                                                                                                                                                                                                                                                                                                                      |
| Methyltransferases:       | MBOVPG45_RS00465 | 0          | 2           | tRNA (cytidine(34)-2'-O)-methyltransferase                                |                  |                                                                                                                                                                                                                                                                                                                                                                      |
|                           | MBOVPG45_RS00470 | 0          | 7           | RNA methyltransferase                                                     |                  |                                                                                                                                                                                                                                                                                                                                                                      |
|                           | MBOVPG45_RS02280 | 0          | 4           | 16S rRNA (uracil(1498)-N(3))-methyltransferase                            |                  |                                                                                                                                                                                                                                                                                                                                                                      |
|                           | rlmB             | 0          | 5           | 23S rRNA (guanosine(2251)-2'-O)-methyltransferase RlmB                    | Predicted AMR    | Michel, G.; Sauvé, V.; Larocque, R.; Li, Y.; Matte, A.; Cygler, M. The Structure of the RlmB 23S rRNA Methyltransferase Reveals a New Methyltransferase Fold with a Unique Knot. Structure 2002, 10, 1303–1315, doi:10.1016/S0969-2126(02)00852-3.                                                                                                                   |
|                           | rlmD             | 0          | 11          | 23S rRNA (uracil(1939)-C(5))-methyltransferase RlmD                       |                  |                                                                                                                                                                                                                                                                                                                                                                      |
|                           | rlmH             | 0          | 1           | 23S rRNA (pseudouridine(1915)-N(3))-methyltransferase RlmH                |                  |                                                                                                                                                                                                                                                                                                                                                                      |
|                           | rsmA             | 0          | 6           | 16S rRNA (adenine(1518)-N(6)/adenine(1519)-N(6))-dimethyltransferase RsmA | aminoglycosides  | Fyfe, C.; Grossman, T.H.; Kerstein, K.; Sutcliffe, J. Resistance to Macrolide Antibiotics in Public Health Pathogens. Cold Spring Harb Perspect Med 2016, 6, a025395, doi:10.1101/cshperspect.a025395.                                                                                                                                                               |

|                        |                  |   |    |                                                       |                 |                                                                                                                                                                                                                                                                                                                                                                                |
|------------------------|------------------|---|----|-------------------------------------------------------|-----------------|--------------------------------------------------------------------------------------------------------------------------------------------------------------------------------------------------------------------------------------------------------------------------------------------------------------------------------------------------------------------------------|
|                        | rsmD             | 0 | 1  | 16S rRNA (guanine(966)-N(2))-methyltransferase RsmD   | aminoglycosides | Fyfe, C.; Grossman, T.H.; Kerstein, K.; Sutcliffe, J. Resistance to Macrolide Antibiotics in Public Health Pathogens. Cold Spring Harb Perspect Med 2016, 6, a025395, doi:10.1101/cshperspect.a025395.                                                                                                                                                                         |
|                        | rsmH             | 0 | 5  | 16S rRNA (cytosine(1402)-N(4))-methyltransferase RsmH | aminoglycosides | Fyfe, C.; Grossman, T.H.; Kerstein, K.; Sutcliffe, J. Resistance to Macrolide Antibiotics in Public Health Pathogens. Cold Spring Harb Perspect Med 2016, 6, a025395, doi:10.1101/cshperspect.a025395.                                                                                                                                                                         |
|                        | rsmI             | 0 | 5  | 16S rRNA (cytidine(1402)-2'-O)-methyltransferase      | aminoglycosides | Fyfe, C.; Grossman, T.H.; Kerstein, K.; Sutcliffe, J. Resistance to Macrolide Antibiotics in Public Health Pathogens. Cold Spring Harb Perspect Med 2016, 6, a025395, doi:10.1101/cshperspect.a025395.                                                                                                                                                                         |
|                        | trmB             | 0 | 4^ | tRNA (guanosine(46)-N7)-methyltransferase TrmB        |                 |                                                                                                                                                                                                                                                                                                                                                                                |
| 30S Ribosomal Proteins | rpsB             | 0 | 3  | 30S ribosomal protein S2                              | aminoglycosides | Feng, Y.; Jonker, M.J.; Moustakas, I.; Brul, S.; ter Kuile, B.H. Dynamics of Mutations during Development of Resistance by Pseudomonas aeruginosa against Five Antibiotics. Antimicrob. Agents Chemother. 2016, 60, 4229–4236, doi:10.1128/AAC.00434-16.                                                                                                                       |
|                        | rpsC             | 2 | 1  | 30S ribosomal protein S3                              | tetracyclines   | Grossman, T.H. Tetracycline Antibiotics and Resistance. Cold Spring Harb Perspect Med 2016, 6, a025387, doi:10.1101/cshperspect.a025387.                                                                                                                                                                                                                                       |
|                        | rpsD             | 0 | 2  | 30S ribosomal protein S4                              |                 |                                                                                                                                                                                                                                                                                                                                                                                |
|                        | rpsE             | 1 | 2  | 30S ribosomal protein S5                              | aminoglycosides | Wang, Z; Kong, LC; Jia, BY; Liu, SM; Jiang, XY; Ma, HX. Aminoglycoside susceptibility of Pasteurella multocida isolates from bovine respiratory infections in China and mutations in ribosomal protein S5 associated with high-level induced spectinomycin resistance. J Vet Med Sci 2017, 79, 1678–1681, doi:10.1292/jvms.17-0219.                                            |
|                        | rpsH             | 0 | 1  | 30S ribosomal protein S8                              |                 |                                                                                                                                                                                                                                                                                                                                                                                |
|                        | rpsJ             | 1 | 0  | 30S ribosomal protein S10                             | tetracyclines   | Hu, M.; Nandi, S.; Davies, C.; Nicholas, R.A. High-Level Chromosomally Mediated Tetracycline Resistance in Neisseria gonorrhoeae Results from a Point Mutation in the rpsJ Gene Encoding Ribosomal Protein S10 in Combination with the mtrR and penB Resistance Determinants. Antimicrobial Agents and Chemotherapy 2005, 49, 4327–4334, doi:10.1128/AAC.49.10.4327-4334.2005. |
|                        | rpsP             | 0 | 2  | 30S ribosomal protein S16                             |                 |                                                                                                                                                                                                                                                                                                                                                                                |
|                        | rpsS             | 0 | 1  | 30S ribosomal protein S19                             |                 |                                                                                                                                                                                                                                                                                                                                                                                |
|                        | rbfA             | 0 | 1  | 30S ribosome-binding factor RbfA                      |                 |                                                                                                                                                                                                                                                                                                                                                                                |
| 50S Ribosomal Proteins | MBOVPG45_RS00445 | 0 | 1  | 50S ribosomal protein L1                              |                 |                                                                                                                                                                                                                                                                                                                                                                                |
|                        | rplB             | 0 | 1  | 50S ribosomal protein L2                              |                 |                                                                                                                                                                                                                                                                                                                                                                                |
|                        | rplC             | 0 | 1  | 50S ribosomal protein L3                              | pleuromutilins  | Long, K.S.; Hansen, L.H.; Jakobsen, L.; Vester, B. Interaction of Pleuromutilin Derivatives with the Ribosomal Peptidyl Transferase Center. AAC 2006, 50, 1458–1462, doi:10.1128/AAC.50.4.1458-1462.2006.                                                                                                                                                                      |

|              |                  |   |    |                                    |                        |                                                                                                                                                                                                                                                                                                                                                                     |
|--------------|------------------|---|----|------------------------------------|------------------------|---------------------------------------------------------------------------------------------------------------------------------------------------------------------------------------------------------------------------------------------------------------------------------------------------------------------------------------------------------------------|
|              | rplD             | 0 | 10 | 50S ribosomal protein L4           | linezolid              | Hölzel, C.S.; Harms, K.S.; Schwaiger, K.; Bauer, J. Resistance to Linezolid in a Porcine Clostridium perfringens Strain Carrying a Mutation in the rplD Gene Encoding the Ribosomal Protein L4. Antimicrobial Agents and Chemotherapy 2010, 54, 1351–1353, doi:10.1128/AAC.01208-09.                                                                                |
|              | MBOVPG45_RS03525 | 0 | 2  | 50S ribosomal protein L10          |                        |                                                                                                                                                                                                                                                                                                                                                                     |
|              | rplV             | 0 | 1  | 50S ribosomal protein L22          | macrolides             | Cagliero, C.; Mouline, C.; Cloeckert, A.; Payot, S. Synergy between Efflux Pump CmeABC and Modifications in Ribosomal Proteins L4 and L22 in Conferring Macrolide Resistance in Campylobacter jejuni and Campylobacter coli. Antimicrobial Agents and Chemotherapy 2006, 50, 3893–3896, doi:10.1128/AAC.00616-06.                                                   |
|              | MBOVPG45_RS01360 | 0 | 1  | 50S ribosomal protein L24          |                        |                                                                                                                                                                                                                                                                                                                                                                     |
|              | rpmE             | 0 | 1  | 50S ribosomal protein L31          | multi-drug resistance  | Liu, A.; Tran, L.; Becket, E.; Lee, K.; Chinn, L.; Park, E.; Tran, K.; Miller, J.H. Antibiotic Sensitivity Profiles Determined with an Escherichia coli Gene Knockout Collection: Generating an Antibiotic Bar Code. AAC 2010, 54, 1393–1403, doi:10.1128/AAC.00906-09.                                                                                             |
| tRNA ligases | alaS             | 1 | 8^ | alanine--tRNA ligase               | novobiocin             | Milija, J.; Lilic, M.; Janjusevic, R.; Jovanovic, G.; Savic, D.J. tRNA Synthetase Mutants of Escherichia coli K-12 Are Resistant to the Gyrase Inhibitor Novobiocin. Journal of Bacteriology 1999, 181, 2979–2983, doi:10.1128/JB.181.9.2979-2983.1999.                                                                                                             |
|              | MBOVPG45_RS01640 | 0 | 5  | arginine--tRNA ligase              |                        |                                                                                                                                                                                                                                                                                                                                                                     |
|              | asnS             | 0 | 1  | asparagine--tRNA ligase            | multi-drug resistance  | Magalhães, S.; Aroso, M.; Roxo, I.; Ferreira, S.; Cerveira, F.; Ramalheira, E.; Ferreira, R.; Vitorino, R. Proteomic profile of susceptible and multidrug-resistant clinical isolates of Escherichia coli and Klebsiella pneumoniae using label-free and immunoproteomic strategies. Research in Microbiology 2017, 168, 222–233, doi:10.1016/j.resmic.2016.12.002. |
|              | MBOVPG45_RS00205 | 0 | 9  | class I tRNA ligase family protein |                        |                                                                                                                                                                                                                                                                                                                                                                     |
|              | MBOVPG45_RS01150 | 0 | 6^ | glutamate--tRNA ligase             |                        |                                                                                                                                                                                                                                                                                                                                                                     |
|              | MBOVPG45_RS02730 | 0 | 2  | glycine--tRNA ligase               |                        |                                                                                                                                                                                                                                                                                                                                                                     |
|              | MBOVPG45_RS02640 | 0 | 1  | histidine--tRNA ligase             |                        |                                                                                                                                                                                                                                                                                                                                                                     |
|              | ileS             | 1 | 5^ | isoleucine--tRNA ligase            | pseudomonic acid       | Yanagisawa, T.; Lee, J.T.; Wu, H.C.; Kawakami, M. Relationship of protein structure of isoleucyl-tRNA synthetase with pseudomonic acid resistance of Escherichia coli. A proposed mode of action of pseudomonic acid as an inhibitor of isoleucyl-tRNA synthetase. J. Biol. Chem. 1994, 269, 24304–24309.                                                           |
|              | MBOVPG45_RS03145 | 0 | 1  | isoleucine--tRNA ligase            |                        |                                                                                                                                                                                                                                                                                                                                                                     |
|              | MBOVPG45_RS02255 | 0 | 16 | leucine--tRNA ligase               |                        |                                                                                                                                                                                                                                                                                                                                                                     |
|              | lysS             | 0 | 3  | lysine--tRNA ligase                | methicillin (B-lactam) | Dordel, J.; Kim, C.; Chung, M.; Pardos de la Gándara, M.; Holden, M.T.J.; Parkhill, J.; de Lencastre, H.; Bentley, S.D.; Tomasz, A. Novel Determinants of Antibiotic Resistance: Identification of Mutated Loci in Highly Methicillin-Resistant Subpopulations of Methicillin-Resistant Staphylococcus aureus. mBio 2014, 5, e01000-13, doi:10.1128/mBio.01000-13.  |

|                          |                  |   |    |                                                               |                       |                                                                                                                                                                                                                                                                                                                                                                     |
|--------------------------|------------------|---|----|---------------------------------------------------------------|-----------------------|---------------------------------------------------------------------------------------------------------------------------------------------------------------------------------------------------------------------------------------------------------------------------------------------------------------------------------------------------------------------|
|                          | MBOVPG45_RS03150 | 0 | 10 | methionine--tRNA ligase                                       |                       |                                                                                                                                                                                                                                                                                                                                                                     |
|                          | pheS             | 0 | 2  | phenylalanine--tRNA ligase subunit alpha                      | multi-drug resistance | Magalhães, S.; Aroso, M.; Roxo, I.; Ferreira, S.; Cerveira, F.; Ramalheira, E.; Ferreira, R.; Vitorino, R. Proteomic profile of susceptible and multidrug-resistant clinical isolates of Escherichia coli and Klebsiella pneumoniae using label-free and immunoproteomic strategies. Research in Microbiology 2017, 168, 222–233, doi:10.1016/j.resmic.2016.12.002. |
|                          | MBOVPG45_RS00380 | 0 | 18 | phenylalanine--tRNA ligase subunit beta                       |                       |                                                                                                                                                                                                                                                                                                                                                                     |
|                          | serS             | 0 | 1  | serine--tRNA ligase                                           |                       |                                                                                                                                                                                                                                                                                                                                                                     |
|                          | MBOVPG45_RS02170 | 1 | 8^ | threonine--tRNA ligase                                        |                       |                                                                                                                                                                                                                                                                                                                                                                     |
|                          | trpS             | 0 | 1  | tryptophan--tRNA ligase                                       |                       |                                                                                                                                                                                                                                                                                                                                                                     |
|                          | MBOVPG45_RS04210 | 0 | 9^ | tyrosine--tRNA ligase                                         |                       |                                                                                                                                                                                                                                                                                                                                                                     |
|                          | MBOVPG45_RS00740 | 0 | 7^ | valine--tRNA ligase                                           |                       |                                                                                                                                                                                                                                                                                                                                                                     |
|                          | tilS             | 0 | 8  | tRNA lysidine(34) synthetase TilS                             |                       |                                                                                                                                                                                                                                                                                                                                                                     |
|                          | thiI             | 0 | 4  | tRNA 4-thiouridine(8) synthase ThiI                           |                       |                                                                                                                                                                                                                                                                                                                                                                     |
|                          | mnmA             | 0 | 5  | tRNA 2-thiouridine(34) synthase MnmA                          |                       |                                                                                                                                                                                                                                                                                                                                                                     |
| <b>ABC Transporters:</b> |                  |   |    |                                                               |                       |                                                                                                                                                                                                                                                                                                                                                                     |
|                          | MBOVPG45_RS00090 | 0 | 1  | ABC transporter ATP-binding protein                           |                       |                                                                                                                                                                                                                                                                                                                                                                     |
|                          | MBOVPG45_RS00180 | 0 | 2  | ABC transporter permease                                      |                       |                                                                                                                                                                                                                                                                                                                                                                     |
|                          | MBOVPG45_RS00555 | 0 | 2  | ABC transporter permease                                      |                       |                                                                                                                                                                                                                                                                                                                                                                     |
|                          | MBOVPG45_RS00570 | 0 | 4  | ATP-binding cassette domain-containing protein                |                       |                                                                                                                                                                                                                                                                                                                                                                     |
|                          | MBOVPG45_RS00600 | 0 | 1  | ATP-binding cassette domain-containing protein                |                       |                                                                                                                                                                                                                                                                                                                                                                     |
|                          | MBOVPG45_RS01485 | 0 | 2  | energy-coupling factor transporter transmembrane protein EcfT |                       |                                                                                                                                                                                                                                                                                                                                                                     |
|                          | MBOVPG45_RS01540 | 0 | 1  | sugar ABC transporter permease                                |                       |                                                                                                                                                                                                                                                                                                                                                                     |
|                          | MBOVPG45_RS01545 | 0 | 4  | ATP-binding cassette domain-containing protein                |                       |                                                                                                                                                                                                                                                                                                                                                                     |
|                          | MBOVPG45_RS01720 | 0 | 1  | ABC transporter permease subunit                              |                       |                                                                                                                                                                                                                                                                                                                                                                     |
|                          | MBOVPG45_RS01770 | 0 | 1  | ABC transporter ATP-binding protein                           |                       |                                                                                                                                                                                                                                                                                                                                                                     |
|                          | MBOVPG45_RS01775 | 1 | 7  | ABC transporter permease                                      |                       |                                                                                                                                                                                                                                                                                                                                                                     |
|                          | MBOVPG45_RS02005 | 0 | 5  | ABC transporter ATP-binding protein                           |                       |                                                                                                                                                                                                                                                                                                                                                                     |
|                          | MBOVPG45_RS02710 | 0 | 1  | ABC transporter permease subunit                              |                       |                                                                                                                                                                                                                                                                                                                                                                     |
|                          | MBOVPG45_RS02715 | 0 | 2  | ATP-binding cassette domain-containing protein                |                       |                                                                                                                                                                                                                                                                                                                                                                     |
|                          | MBOVPG45_RS02905 | 1 | 1  | ABC transporter permease subunit                              |                       |                                                                                                                                                                                                                                                                                                                                                                     |
|                          | MBOVPG45_RS03425 | 0 | 1  | ATP-binding cassette domain-containing protein                |                       |                                                                                                                                                                                                                                                                                                                                                                     |
|                          | MBOVPG45_RS03465 | 0 | 4  | ABC transporter ATP-binding protein                           |                       |                                                                                                                                                                                                                                                                                                                                                                     |
|                          | MBOVPG45_RS03705 | 0 | 6^ | carbohydrate ABC transporter permease                         |                       |                                                                                                                                                                                                                                                                                                                                                                     |
|                          | MBOVPG45_RS03710 | 0 | 1  | sugar ABC transporter permease                                |                       |                                                                                                                                                                                                                                                                                                                                                                     |
|                          | MBOVPG45_RS04310 | 0 | 5  | ABC transporter ATP-binding protein                           |                       |                                                                                                                                                                                                                                                                                                                                                                     |
|                          | MBOVPG45_RS04315 | 1 | 89 | ABC transporter permease                                      |                       |                                                                                                                                                                                                                                                                                                                                                                     |

^Contains a gene-disrupting NSM.

\*Identical NSM
