# Supplementary material for: Identification of Antimicrobial Resistance-Associated Genes through Whole Genome Sequencing of Mycoplasma bovis Isolates with Different Antimicrobial Resistances
Source: MDPI journal article supplement (doi:10.3390/pathogens9070588), 2020-07-19
Supplement: s1 [file s1]

**Table S2 Summary of Nonsynonymous mutations of isolate 1982-M6152 (1982) and 19-043682 (2019)**

**S2-1 Potential AMR mutation sites:**

| Strain | 1982<br>(Y/N) | 2019<br>(Y/N) | Ref Pos | Gene Name        | PG45<br>Gene size<br>(nt) | #Mutations | Mutations<br>/100 nt | Disrupted<br>(Y/N) | Gene Description                                                                              | Functional Role:                    | Notes:                                                                  |
|--------|---------------|---------------|---------|------------------|---------------------------|------------|----------------------|--------------------|-----------------------------------------------------------------------------------------------|-------------------------------------|-------------------------------------------------------------------------|
| 2019   | N             | Y             | 375     | dnaA             | 1401                      | 1          | 0.07                 | N                  | chromosomal replication initiator protein DnaA                                                | Replication                         | Rifamycin inhibitor                                                     |
| 2019   | N             | Y             | 1717    | MBOVPG45_RS00010 | 1110                      | 1          | 0.09                 | N                  | DNA polymerase III subunit beta                                                               | Replication                         |                                                                         |
| 2019   | N             | Y             | 15908   | MBOVPG45_RS00090 | 1605                      | 1          | 0.06                 | N                  | ABC transporter ATP-binding protein                                                           | ABC transporter system              | ABC transporter system<br>involved in efflux pump<br>resistance         |
| Both   | Y             | Y             | 22594   | MBOVPG45_RS00115 | 1872                      | 2          | 0.11                 | Both               | peptidase S41                                                                                 | Protein Synthesis                   |                                                                         |
| 2019   | N             | Y             | 36577   | MBOVPG45_RS00180 | 1086                      | 2          | 0.18                 | N                  | ABC transporter permease                                                                      | ABC transporter system              |                                                                         |
| 2019   | N             | Y             | 53148   | MBOVPG45_RS00205 | 1242                      | 9          | 0.72                 | N                  | class I tRNA ligase family protein                                                            | Protein Synthesis                   |                                                                         |
| 2019   | N             | Y             | 54319   | rlmB             | 702                       | 5          | 0.71                 | N                  | 23S rRNA (guanosine(2251)-2'-O)-methyltransferase RlmB                                        | Protein Synthesis                   | rlmA confers resistance to<br>mycinamicin, tylosin and<br>lincosamides  |
| 2019   | N             | Y             | 54964   | MBOVPG45_RS00215 | 585                       | 5          | 0.85                 | 2019               | sigma-70 family RNA polymerase sigma factor                                                   | Transcription                       | Rifamycin inhibitor                                                     |
| 2019   | N             | Y             | 55733   | secE             | 237                       | 1          | 0.42                 | N                  | preprotein translocase subunit SecE                                                           | Protein transport                   |                                                                         |
| 2019   | N             | Y             | 61321   | MBOVPG45_RS00245 | 552                       | 3          | 0.54                 | N                  | ribosome recycling factor (frr)                                                               | Protein Synthesis                   |                                                                         |
| 2019   | N             | Y             | 67139   | rsmA             | 789                       | 6          | 0.76                 | N                  | 16S rRNA (adenine(1518)-N(6)/adenine(1519)-N(6))-dimethyltransferase RsmA                     | Protein Synthesis                   | 16S methyltransferases<br>mutations confer<br>aminoglycoside resistance |
| 2019   | N             | Y             | 68835   | mnmE             | 1338                      | 4          | 0.30                 | N                  | tRNA uridine-5-carboxymethylaminomethyl(34) synthesis GTPase MnmE                             | Protein Synthesis                   |                                                                         |
| 2019   | N             | Y             | 72682   | serS             | 1269                      | 1          | 0.08                 | N                  | serine--tRNA ligase                                                                           | Protein Synthesis                   |                                                                         |
| Both   | Y             | Y             | 75564   | yidC             | 2166                      | 10         | 0.46                 | 1982               | membrane protein insertase YidC                                                               | Protein transport                   |                                                                         |
| Both   | Y             | Y             | 81331   | MBOVPG45_RS00350 | 4377                      | 15         | 0.34                 | N                  | PolC-type DNA polymerase III                                                                  | Replication                         |                                                                         |
| 2019   | N             | Y             | 86893   | MBOVPG45_RS00365 | 1224                      | 3          | 0.25                 | N                  | replication-associated recombination protein A                                                | Replication, DNA<br>recombination   |                                                                         |
| 2019   | N             | Y             | 87536   | pheS             | 966                       | 2          | 0.21                 | N                  | phenylalanine--tRNA ligase subunit alpha                                                      | Protein Synthesis                   |                                                                         |
| 2019   | N             | Y             | 89028   | MBOVPG45_RS00380 | 2187                      | 18         | 0.82                 | N                  | phenylalanine--tRNA ligase subunit beta                                                       | Protein Synthesis                   |                                                                         |
| 2019   | N             | Y             | 93312   | MBOVPG45_RS00395 | 1161                      | 10         | 0.86                 | N                  | aminotransferase class V-fold PLP-dependent enzyme                                            | Protein Synthesis                   |                                                                         |
| 2019   | N             | Y             | 94484   | MBOVPG45_RS00400 | 429                       | 7          | 1.63                 | N                  | iron-sulfur cluster assembly scaffold protein                                                 | Protein assembly                    |                                                                         |
| 2019   | N             | Y             | 94954   | MBOVPG45_RS00405 | 1248                      | 6          | 0.48                 | N                  | DNA polymerase IV                                                                             | Replication                         |                                                                         |
| Both   | Y             | Y             | 97237   | MBOVPG45_RS00415 | 768                       | 2          | 0.26                 | N                  | rRNA pseudouridine synthase                                                                   | Protein Synthesis                   |                                                                         |
| 2019   | N             | Y             | 102115  | MBOVPG45_RS00445 | 696                       | 1          | 0.14                 | N                  | 50S ribosomal protein L1                                                                      | Protein Synthesis                   |                                                                         |
| 2019   | N             | Y             | 105222  | MBOVPG45_RS00465 | 534                       | 2          | 0.37                 | N                  | tRNA (cytidine(34)-2'-O)-methyltransferase                                                    | Protein Synthesis                   |                                                                         |
| 2019   | N             | Y             | 105633  | MBOVPG45_RS00470 | 732                       | 7          | 0.96                 | N                  | RNA methyltransferase                                                                         | Protein Synthesis                   |                                                                         |
| 2019   | N             | Y             | 106703  | ylqF             | 861                       | 3          | 0.35                 | N                  | ribosome biogenesis GTPase YlqF                                                               | Protein Synthesis                   |                                                                         |
| 2019   | N             | Y             | 122978  | MBOVPG45_RS00555 | 1122                      | 2          | 0.18                 | N                  | ABC transporter permease                                                                      | ABC transporter system              |                                                                         |
| 2019   | N             | Y             | 126802  | MBOVPG45_RS00570 | 2403                      | 4          | 0.17                 | N                  | ATP-binding cassette domain-containing protein                                                | ABC transporter system              |                                                                         |
| 2019   | N             | Y             | 133930  | MBOVPG45_RS00600 | 2058                      | 1          | 0.05                 | N                  | ATP-binding cassette domain-containing protein                                                | ABC transporter system              |                                                                         |
| 2019   | N             | Y             | 155399  | thiI             | 1137                      | 4          | 0.35                 | N                  | tRNA 4-thiouridine(8) synthase ThiI                                                           | Protein Synthesis                   |                                                                         |
| 2019   | N             | Y             | 170114  | MBOVPG45_RS00740 | 2490                      | 7          | 0.28                 | 2019               | valine--tRNA ligase                                                                           | Protein Synthesis                   |                                                                         |
| 2019   | N             | Y             | 180543  | dnaK             | 1779                      | 2          | 0.11                 | N                  | molecular chaperone DnaK                                                                      | Protein Synthesis                   |                                                                         |
| 2019   | N             | Y             | 181437  | MBOVPG45_RS00790 | 1284                      | 7          | 0.55                 | N                  | methylenetetrahydrofolate--tRNA-(uracil(54)-C(5))-methyltransferase (FADH(2)-oxidizing) TrmFO | DNA methylation                     |                                                                         |
| 2019   | N             | Y             | 187768  | MBOVPG45_RS00815 | 2424                      | 9          | 0.37                 | N                  | DEAD/DEAH box helicase family protein                                                         | Transcription, Protein<br>synthesis |                                                                         |
| 2019   | N             | Y             | 195409  | tig              | 1506                      | 3          | 0.20                 | N                  | trigger factor                                                                                | Protein Synthesis                   |                                                                         |

|      |   |   |        |                  |      |    |      |      |                                                                                               |                                            |                                      |
|------|---|---|--------|------------------|------|----|------|------|-----------------------------------------------------------------------------------------------|--------------------------------------------|--------------------------------------|
| Both | Y | Y | 248926 | MBOVPG45_RS01075 | 1266 | 33 | 2.61 | Both | endonuclease/exonuclease/phosphatase family protein                                           | Cell signalling, DNA repair                |                                      |
| 2019 | N | Y | 264264 | MBOVPG45_RS01150 | 1392 | 6  | 0.43 | 2019 | glutamate--tRNA ligase                                                                        | Protein Synthesis                          |                                      |
| 2019 | N | Y | 265487 | MBOVPG45_RS01155 | 2040 | 29 | 1.42 | 2019 | peptidase S41                                                                                 | Protein Synthesis                          |                                      |
| 2019 | N | Y | 267529 | MBOVPG45_RS01160 | 1932 | 25 | 1.29 | N    | peptidase S41                                                                                 | Protein Synthesis                          |                                      |
| 2019 | N | Y | 289078 | gyrA             | 2760 | 8  | 0.29 | N    | DNA gyrase subunit A                                                                          | Topoisomerase                              | fluoroquinolone resistance           |
| 2019 | N | Y | 293726 | rpsD             | 597  | 2  | 0.34 | N    | 30S ribosomal protein S4                                                                      | Protein Synthesis                          |                                      |
| 2019 | N | Y | 294448 | rpmE             | 213  | 1  | 0.47 | N    | 50S ribosomal protein L31                                                                     | Protein Synthesis                          |                                      |
| 2019 | N | Y | 294901 | hrcA             | 1008 | 1  | 0.10 | N    | heat-inducible transcriptional repressor HrcA                                                 | Transcription                              |                                      |
| 2019 | N | Y | 295867 | grpE             | 1026 | 4  | 0.39 | N    | nucleotide exchange factor GrpE                                                               | Protein Synthesis                          |                                      |
| 2019 | N | Y | 298696 | MBOVPG45_RS01270 | 711  | 2  | 0.28 | N    | rRNA pseudouridine synthase                                                                   | Protein Synthesis                          |                                      |
| 1982 | Y | N | 304123 | rpsJ             | 324  | 1  | 0.31 | N    | 30S ribosomal protein S10                                                                     | Protein Synthesis                          | rpsJ confers tetracycline resistance |
| Both | Y | Y | 305116 | rplC             | 831  | 1  | 0.12 | N    | 50S ribosomal protein L3                                                                      | Protein Synthesis                          |                                      |
| 2019 | N | Y | 305204 | rplD             | 951  | 10 | 1.05 | N    | 50S ribosomal protein L4                                                                      | Protein Synthesis                          | rplD confers macrolide resistance    |
| 2019 | N | Y | 306754 | rplB             | 846  | 1  | 0.12 | N    | 50S ribosomal protein L2                                                                      | Protein Synthesis                          |                                      |
| 2019 | N | Y | 307518 | rpsS             | 279  | 1  | 0.36 | N    | 30S ribosomal protein S19                                                                     | Protein Synthesis                          |                                      |
| 2019 | N | Y | 308038 | rplV             | 345  | 1  | 0.29 | N    | 50S ribosomal protein L22                                                                     | Protein Synthesis                          |                                      |
| 2019 | N | Y | 308343 | rpsC             | 651  | 3  | 0.46 | N    | 30S ribosomal protein S3                                                                      | Protein Synthesis                          |                                      |
| 2019 | N | Y | 310225 | MBOVPG45_RS01360 | 327  | 1  | 0.31 | N    | 50S ribosomal protein L24                                                                     | Protein Synthesis                          |                                      |
| 2019 | N | Y | 311251 | rpsH             | 396  | 1  | 0.25 | N    | 30S ribosomal protein S8                                                                      | Protein Synthesis                          |                                      |
| Both | Y | Y | 312554 | rpsE             | 696  | 3  | 0.43 | N    | 30S ribosomal protein S5                                                                      | Protein Synthesis                          |                                      |
| 2019 | N | Y | 333960 | MBOVPG45_RS01485 | 906  | 2  | 0.22 | N    | energy-coupling factor transporter transmembrane protein EcjT                                 | ABC transporter system                     |                                      |
| 2019 | N | Y | 341084 | obgE             | 1269 | 2  | 0.16 | N    | GTPase ObgE                                                                                   | Protein Synthesis                          |                                      |
| 2019 | N | Y | 345146 | MBOVPG45_RS01540 | 1068 | 1  | 0.09 | N    | sugar ABC transporter permease                                                                | ABC transporter system                     |                                      |
| 2019 | N | Y | 345580 | MBOVPG45_RS01545 | 2103 | 4  | 0.19 | N    | ATP-binding cassette domain-containing protein                                                | ABC transporter system                     |                                      |
| 2019 | N | Y | 371209 | MBOVPG45_RS01640 | 1620 | 5  | 0.31 | N    | arginine--tRNA ligase                                                                         | Protein Synthesis                          |                                      |
| 2019 | N | Y | 380382 | lepA             | 1794 | 4  | 0.22 | N    | elongation factor 4                                                                           | Protein Synthesis                          |                                      |
| 2019 | N | Y | 392689 | MBOVPG45_RS01720 | 1119 | 1  | 0.09 | N    | ABC transporter permease subunit                                                              | ABC transporter system                     |                                      |
| 2019 | N | Y | 401183 | MBOVPG45_RS01770 | 705  | 1  | 0.14 | N    | ABC transporter ATP-binding protein                                                           | ABC transporter system                     |                                      |
| Both | Y | Y | 401939 | MBOVPG45_RS01775 | 1863 | 8  | 0.43 | N    | ABC transporter permease                                                                      | ABC transporter system                     |                                      |
| 2019 | N | Y | 411488 | MBOVPG45_RS01820 | 963  | 7  | 0.73 | N    | DNA polymerase III subunit delta                                                              | Replication                                |                                      |
| 2019 | N | Y | 416161 | whiA             | 882  | 3  | 0.34 | N    | DNA-binding protein WhiA                                                                      | Replication                                |                                      |
| 2019 | N | Y | 419734 | ligA             | 1965 | 2  | 0.10 | N    | DNA ligase (NAD(+)) LigA                                                                      | Replication, DNA repair                    |                                      |
| 2019 | N | Y | 454173 | asnS             | 1359 | 1  | 0.07 | N    | asparagine--tRNA ligase                                                                       | Protein Synthesis                          |                                      |
| 2019 | N | Y | 462062 | MBOVPG45_RS02005 | 1797 | 5  | 0.28 | N    | ABC transporter ATP-binding protein                                                           | ABC transporter system                     |                                      |
| 2019 | N | Y | 477575 | tsaE             | 405  | 2  | 0.49 | N    | tRNA (adenosine(37)-N6)-threonylcarbamoyltransferase complex ATPase subunit type 1 TsaE       | Protein Synthesis                          |                                      |
| 2019 | N | Y | 477995 | MBOVPG45_RS02070 | 558  | 4  | 0.72 | N    | tRNA (adenosine(37)-N6)-threonylcarbamoyltransferase complex dimerization subunit type 1 TsaB | Protein Synthesis                          |                                      |
| 2019 | N | Y | 478888 | tsaD             | 930  | 3  | 0.32 | N    | tRNA (adenosine(37)-N6)-threonylcarbamoyltransferase complex transferase subunit TsaD         | Protein Synthesis                          |                                      |
| 2019 | N | Y | 487031 | MBOVPG45_RS02105 | 1959 | 1  | 0.05 | N    | peptidase S41                                                                                 | Protein Synthesis                          |                                      |
| 2019 | N | Y | 504209 | trpS             | 996  | 1  | 0.10 | N    | tryptophan--tRNA ligase                                                                       | Protein Synthesis                          |                                      |
| Both | Y | Y | 505264 | MBOVPG45_RS02170 | 1749 | 9  | 0.51 | 2019 | threonine--tRNA ligase                                                                        | Protein Synthesis                          |                                      |
| 2019 | N | Y | 523679 | MBOVPG45_RS02255 | 2340 | 16 | 0.68 | N    | leucine--tRNA ligase                                                                          | Protein Synthesis                          |                                      |
| Both | Y | Y | 527473 | ssb              | 561  | 5  | 0.89 | N    | single-stranded DNA-binding protein                                                           | Replication, DNA recombination, DNA repair |                                      |

|      |   |   |        |                  |      |    |      |      |                                                                   |                                            |                                                           |
|------|---|---|--------|------------------|------|----|------|------|-------------------------------------------------------------------|--------------------------------------------|-----------------------------------------------------------|
| 2019 | N | Y | 529969 | MBOVPG45_RS02280 | 684  | 4  | 0.58 | N    | 16S rRNA (uracil(1498)-N(3))-methyltransferase                    | Protein Synthesis                          |                                                           |
| 2019 | N | Y | 531421 | MBOVPG45_RS02290 | 1143 | 2  | 0.17 | N    | cell division protein FtsZ                                        | Replication                                |                                                           |
| 2019 | N | Y | 534120 | rsmH             | 903  | 5  | 0.55 | N    | 16S rRNA (cytosine(1402)-N(4))-methyltransferase RsmH             | Protein Synthesis                          |                                                           |
| 2019 | N | Y | 538752 | dcm              | 948  | 7  | 0.74 | N    | DNA cytosine methyltransferase                                    | DNA methylation                            |                                                           |
| 2019 | N | Y | 545064 | MBOVPG45_RS02345 | 687  | 5  | 0.73 | N    | NERD domain-containing protein                                    | Replication                                |                                                           |
| 2019 | N | Y | 566912 | MBOVPG45_RS02435 | 432  | 2  | 0.46 | N    | single-stranded DNA-binding protein                               | Replication, DNA recombination, DNA repair |                                                           |
| Both | Y | Y | 582733 | alaS             | 1136 | 9  | 0.79 | 2019 | alanine--tRNA ligase                                              | Protein Synthesis                          | novobiocin resistance                                     |
| 2019 | N | Y | 585222 | mnmA             | 1125 | 5  | 0.44 | N    | tRNA 2-thiouridine(34) synthase MnmA                              | Protein Synthesis                          |                                                           |
| 2019 | N | Y | 606351 | MBOVPG45_RS02615 | 1002 | 1  | 0.10 | N    | bifunctional oligoribonuclease/PAP phosphatase NrnA               | Protein Synthesis                          |                                                           |
| 2019 | N | Y | 613725 | MBOVPG45_RS02640 | 1317 | 1  | 0.08 | N    | histidine--tRNA ligase                                            | Protein Synthesis                          |                                                           |
| 2019 | N | Y | 624992 | topA             | 1842 | 1  | 0.05 | 2019 | type I DNA topoisomerase                                          | Topoisomerase                              |                                                           |
| 2019 | N | Y | 631133 | MBOVPG45_RS02710 | 1752 | 1  | 0.06 | N    | ABC transporter permease subunit                                  | ABC transporter system                     |                                                           |
| 2019 | N | Y | 631191 | MBOVPG45_RS02715 | 933  | 2  | 0.21 | N    | ATP-binding cassette domain-containing protein                    | ABC transporter system                     |                                                           |
| 2019 | N | Y | 636688 | MBOVPG45_RS02730 | 1377 | 2  | 0.15 | N    | glycine--tRNA ligase                                              | Protein Synthesis                          |                                                           |
| 2019 | N | Y | 637373 | dnaG             | 1941 | 4  | 0.21 | N    | DNA primase                                                       | Replication                                |                                                           |
| 2019 | N | Y | 639516 | MBOVPG45_RS02740 | 1530 | 1  | 0.07 | N    | RNA polymerase sigma factor                                       | Transcription                              | Rifamycin inhibitor                                       |
| 2019 | N | Y | 643759 | MBOVPG45_RS02760 | 1875 | 18 | 0.96 | 2019 | peptidase S41                                                     | Protein Synthesis                          |                                                           |
| 2019 | N | Y | 645973 | MBOVPG45_RS02765 | 897  | 5  | 0.56 | N    | elongation factor Ts                                              | Protein Synthesis                          |                                                           |
| 2019 | N | Y | 646646 | rpsB             | 954  | 3  | 0.31 | N    | 30S ribosomal protein S2                                          | Protein Synthesis                          |                                                           |
| 2019 | N | Y | 656135 | MBOVPG45_RS02805 | 2088 | 14 | 0.67 | N    | peptidase S41                                                     | Protein Synthesis                          |                                                           |
| 2019 | N | Y | 674943 | dnaB             | 1476 | 1  | 0.07 | N    | replicative DNA helicase                                          | Replication                                |                                                           |
| Both | Y | Y | 682961 | MBOVPG45_RS02905 | 825  | 2  | 0.24 | N    | ABC transporter permease subunit                                  | ABC transporter system                     |                                                           |
| Both | Y | Y | 697741 | ileS             | 2679 | 6  | 0.22 | 2019 | isoleucine--tRNA ligase                                           | Protein Synthesis                          | pseudomonic acid target                                   |
| 2019 | N | Y | 700827 | MBOVPG45_RS03000 | 1620 | 2  | 0.12 | N    | CTP synthase                                                      | Nucleotide synthesis                       |                                                           |
| 2019 | N | Y | 730969 | MBOVPG45_RS03145 | 807  | 1  | 0.12 | N    | isoleucine--tRNA ligase                                           | Protein Synthesis                          |                                                           |
| 2019 | N | Y | 731350 | MBOVPG45_RS03150 | 1551 | 10 | 0.64 | 2019 | methionine--tRNA ligase                                           | Protein Synthesis                          |                                                           |
| Both | Y | Y | 757435 | parC             | 2586 | 19 | 0.73 | N    | DNA topoisomerase IV subunit A                                    | Topoisomerase                              | fluoroquinolone resistance                                |
| 2019 | N | Y | 760101 | parE             | 1917 | 4  | 0.21 | N    | DNA topoisomerase IV subunit B                                    | Topoisomerase                              | fluoroquinolone resistance                                |
| 2019 | N | Y | 764252 | rsmD             | 549  | 1  | 0.18 | N    | 16S rRNA (guanine(966)-N(2))-methyltransferase RsmD               | Protein Synthesis                          |                                                           |
| 2019 | N | Y | 767941 | MBOVPG45_RS03325 | 453  | 1  | 0.22 | N    | 23S rRNA (pseudouridine(1915)-N(3))-methyltransferase RlmH        | Protein Synthesis                          |                                                           |
| 2019 | N | Y | 768041 | mnmG             | 1842 | 6  | 0.33 | N    | tRNA uridine-5-carboxymethylaminomethyl(34) synthesis enzyme MnmG | Protein Synthesis                          |                                                           |
| Both | Y | Y | 785098 | dnaE             | 2934 | 16 | 0.55 | N    | DNA polymerase III subunit alpha                                  | Replication                                |                                                           |
| 2019 | N | Y | 798146 | MBOVPG45_RS03425 | 1614 | 1  | 0.06 | N    | ATP-binding cassette domain-containing protein                    | ABC transporter system                     | tylosin resistance (GenBank), macrolide resistance (CARD) |
| 2019 | N | Y | 805063 | MBOVPG45_RS03465 | 1833 | 4  | 0.22 | N    | ABC transporter ATP-binding protein                               | ABC transporter system                     |                                                           |
| 2019 | N | Y | 806434 | MBOVPG45_RS03470 | 1785 | 6  | 0.34 | N    | ABC transporter ATP-binding protein                               | ABC transporter system                     |                                                           |
| 2019 | N | Y | 826479 | rpoC             | 4437 | 1  | 0.02 | N    | DNA-directed RNA polymerase subunit beta'                         | Transcription                              | Rifamycin inhibitor                                       |
| 2019 | N | Y | 830647 | MBOVPG45_RS03510 | 3636 | 1  | 0.03 | N    | DNA-directed RNA polymerase subunit beta                          | Transcription                              |                                                           |
| 2019 | N | Y | 832675 | MBOVPG45_RS03525 | 522  | 2  | 0.38 | N    | 50S ribosomal protein L10                                         | Protein Synthesis                          |                                                           |
| 2019 | N | Y | 834722 | lysS             | 1470 | 3  | 0.20 | N    | lysine--tRNA ligase                                               | Protein Synthesis                          |                                                           |
| 2019 | N | Y | 836887 | MBOVPG45_RS03545 | 2160 | 8  | 0.37 | 2019 | S1 RNA-binding domain-containing protein                          | Protein Synthesis                          |                                                           |
| 2019 | N | Y | 846198 | rpsP             | 291  | 2  | 0.69 | N    | 30S ribosomal protein S16                                         | Protein Synthesis                          |                                                           |
| 2019 | N | Y | 847407 | fnt              | 840  | 4  | 0.48 | N    | methionyl-tRNA formyltransferase                                  | Protein Synthesis                          |                                                           |
| Both | Y | Y | 853121 | MBOVPG45_RS03600 | 867  | 3  | 0.35 | 1982 | MurR/RpiR family transcriptional regulator                        | Transcription                              |                                                           |
| 2019 | N | Y | 873133 | MBOVPG45_RS03705 | 813  | 6  | 0.74 | 2019 | carbohydrate ABC transporter permease                             | ABC transporter system                     |                                                           |
| 2019 | N | Y | 873886 | MBOVPG45_RS03710 | 996  | 1  | 0.10 | N    | sugar ABC transporter permease                                    | ABC transporter system                     |                                                           |
| 2019 | N | Y | 880184 | MBOVPG45_RS03730 | 738  | 2  | 0.27 | N    | YebC/PmpR family DNA-binding transcriptional regulator            | Transcription                              |                                                           |

|      |   |   |         |                  |      |    |      |      |                                                               |                        |                            |
|------|---|---|---------|------------------|------|----|------|------|---------------------------------------------------------------|------------------------|----------------------------|
| 2019 | N | Y | 883839  | rlmD             | 1323 | 11 | 0.83 | N    | 23S rRNA (uracil(1939)-C(5))-methyltransferase RlmD           | Protein Synthesis      |                            |
| Both | Y | Y | 898026  | MBOVPG45_RS03825 | 918  | 1  | 0.11 | N    | RluA family pseudouridine synthase                            | Protein Synthesis      |                            |
| 2019 | N | Y | 900146  | trmB             | 618  | 4  | 0.65 | 2019 | tRNA (guanosine(46)-N7)-methyltransferase TrmB                | Protein Synthesis      |                            |
| 2019 | N | Y | 904514  | rsmI             | 726  | 5  | 0.69 | N    | 16S rRNA (cytidine(1402)-2'-O)-methyltransferase              | Protein Synthesis      |                            |
| 2019 | N | Y | 905196  | MBOVPG45_RS03870 | 903  | 6  | 0.66 | N    | DNA polymerase III subunit delta                              | Replication            |                            |
| Both | Y | Y | 906098  | MBOVPG45_RS03875 | 648  | 3  | 0.46 | N    | dTMP kinase                                                   | Nucleotide synthesis   |                            |
| 2019 | N | Y | 907714  | dnaX             | 1851 | 6  | 0.32 | N    | DNA polymerase III subunit gamma/tau                          | Replication            |                            |
| 2019 | N | Y | 918571  | MBOVPG45_RS03945 | 723  | 1  | 0.14 | N    | adenine phosphoribosyltransferase                             | Nucleotide synthesis   |                            |
| 2019 | N | Y | 920868  | MBOVPG45_RS03950 | 1806 | 1  | 0.06 | N    | translation initiation factor IF-2                            | Protein Synthesis      |                            |
| 2019 | N | Y | 921262  | nusA             | 1635 | 6  | 0.37 | N    | transcription termination/antitermination protein NusA        | Transcription          |                            |
| 2019 | N | Y | 956001  | gatB             | 1422 | 8  | 0.56 | N    | Asp-tRNA(Asn)/Glu-tRNA(Gln) amidotransferase subunit GatB     | Protein Synthesis      |                            |
| 2019 | N | Y | 957458  | gatA             | 1314 | 8  | 0.61 | N    | Asp-tRNA(Asn)/Glu-tRNA(Gln) amidotransferase subunit GatA     | Protein Synthesis      |                            |
| 2019 | N | Y | 958689  | MBOVPG45_RS04140 | 306  | 4  | 1.31 | N    | glutamyl-tRNA(Gln) amidotransferase                           | Protein Synthesis      |                            |
| 2019 | N | Y | 965875  | MBOVPG45_RS04185 | 1134 | 4  | 0.35 | N    | DnaJ domain-containing protein                                | Protein Synthesis      |                            |
| 2019 | N | Y | 966639  | rbfA             | 342  | 1  | 0.29 | N    | 30S ribosome-binding factor RbfA                              | Protein Synthesis      |                            |
| 2019 | N | Y | 969173  | MBOVPG45_RS04210 | 1236 | 9  | 0.73 | 2019 | tyrosine--tRNA ligase                                         | Protein Synthesis      |                            |
| 2019 | N | Y | 970301  | MBOVPG45_RS04215 | 603  | 2  | 0.33 | N    | tRNA-binding protein                                          | Protein Synthesis      |                            |
| 2019 | N | Y | 972501  | prnC             | 723  | 3  | 0.41 | N    | peptide chain release factor N(5)-glutamine methyltransferase | DNA methylation        |                            |
| 2019 | N | Y | 974517  | MBOVPG45_RS04245 | 573  | 7  | 1.22 | N    | cell division protein Fic                                     | Replication            |                            |
| 2019 | N | Y | 976501  | MBOVPG45_RS04255 | 1968 | 6  | 0.30 | N    | type IIA DNA topoisomerase subunit B (gyrB)                   | Topoisomerase          | fluoroquinolone resistance |
| 2019 | N | Y | 978986  | smpB             | 447  | 2  | 0.45 | N    | SsrA-binding protein                                          | Protein Synthesis      |                            |
| 2019 | N | Y | 982458  | MBOVPG45_RS04285 | 960  | 1  | 0.10 | N    | LacI family transcriptional regulator                         | Transcription          |                            |
| 2019 | N | Y | 988794  | MBOVPG45_RS04310 | 1089 | 5  | 0.46 | N    | ABC transporter ATP-binding protein                           | ABC transporter system |                            |
| Both | Y | Y | 989187  | MBOVPG45_RS04315 | 8127 | 90 | 1.11 | N    | ABC transporter permease                                      | ABC transporter system |                            |
| 2019 | N | Y | 999725  | tilS             | 861  | 8  | 0.93 | N    | tRNA lysidine(34) synthetase TilS                             | Protein Synthesis      |                            |
| 2019 | N | Y | 1000569 | MBOVPG45_RS04330 | 567  | 1  | 0.18 | N    | aminoacyl-tRNA hydrolase                                      | Protein Synthesis      |                            |
|      |   |   |         |                  |      |    |      |      |                                                               |                        |                            |

## S2-2. Unlikely AMR Candidates:

| Strain | 1982<br>(Y/N) | 2019<br>(Y/N) | Ref Pos | Gene Name        | PG45<br>Gene size<br>(nt) | #Mutations | Mutations<br>/100 nt | Disrupted<br>(Y/N) | Gene Description                               |                              |  |
|--------|---------------|---------------|---------|------------------|---------------------------|------------|----------------------|--------------------|------------------------------------------------|------------------------------|--|
| 1982   | Y             | N             | 3257    | MBOVPG45_RS00030 | 786                       | 1          | 0.13                 | N                  | alpha/beta hydrolase                           | Multi-role family            |  |
| 2019   | N             | Y             | 4439    | MBOVPG45_RS00035 | 792                       | 1          | 0.13                 | N                  | alpha/beta hydrolase                           | Multi-role family            |  |
| 2019   | N             | Y             | 5197    | MBOVPG45_RS00040 | 1182                      | 3          | 0.25                 | N                  | NADH-dependent flavin oxidoreductase           | Metabolism                   |  |
| 2019   | N             | Y             | 6185    | MBOVPG45_RS00045 | 1047                      | 3          | 0.29                 | N                  | lipoate--protein ligase A                      | Metabolism                   |  |
| 2019   | N             | Y             | 7253    | MBOVPG45_RS00050 | 1038                      | 1          | 0.10                 | N                  | lipoate--protein ligase                        | Metabolism                   |  |
| 2019   | N             | Y             | 11281   | MBOVPG45_RS00070 | 1413                      | 1          | 0.07                 | N                  | IS1634-like element ISMbov2 family transposase | Transposable elements        |  |
| 2019   | N             | Y             | 36735   | MBOVPG45_RS00185 | 2952                      | 9          | 0.30                 | N                  | variable surface lipoprotein                   | variable surface lipoprotein |  |
| 2019   | N             | Y             | 61188   | MBOVPG45_RS00240 | 723                       | 1          | 0.14                 | N                  | UMP kinase                                     | Metabolism                   |  |
| 2019   | N             | Y             | 66075   | MBOVPG45_RS00275 | 999                       | 7          | 0.70                 | N                  | NAD(P)-binding domain-containing protein       | Metabolism                   |  |
| 2019   | N             | Y             | 67846   | MBOVPG45_RS00285 | 762                       | 5          | 0.66                 | N                  | TatD family hydrolase                          | DNA repair                   |  |
| 2019   | N             | Y             | 73768   | MBOVPG45_RS00310 | 1032                      | 3          | 0.29                 | N                  | glycosyltransferase family 2 protein           | Metabolism                   |  |
| 2019   | N             | Y             | 74822   | rnpA             | 324                       | 3          | 0.93                 | N                  | ribonuclease P protein component               | Rnase                        |  |
| 2019   | N             | Y             | 78149   | MBOVPG45_RS00330 | 981                       | 1          | 0.10                 | N                  | lipoate--protein ligase                        | Metabolism                   |  |
| Both   | Y             | Y             | 78548   | MBOVPG45_RS00335 | 822                       | 6          | 0.73                 | N                  | alpha/beta hydrolase                           | Multi-role family            |  |
| 2019   | N             | Y             | 80472   | MBOVPG45_RS00345 | 981                       | 3          | 0.31                 | N                  | aspartate--ammonia ligase                      | Metabolism                   |  |
| 2019   | N             | Y             | 88161   | MBOVPG45_RS00375 | 660                       | 4          | 0.61                 | N                  | uracil-DNA glycosylase                         | DNA repair                   |  |
| 2019   | N             | Y             | 91227   | MBOVPG45_RS00385 | 1266                      | 5          | 0.39                 | N                  | serine hydroxymethyltransferase                | Methylation                  |  |

|      |   |   |        |                  |      |    |      |      |                                                                                                        |                                |  |
|------|---|---|--------|------------------|------|----|------|------|--------------------------------------------------------------------------------------------------------|--------------------------------|--|
| 2019 | N | Y | 92255  | pip              | 972  | 7  | 0.72 | 2019 | prolyl aminopeptidase                                                                                  | Metabolism                     |  |
| 2019 | N | Y | 96345  | MBOVPG45_RS00410 | 1095 | 2  | 0.18 | N    | nicotinate-nucleotide adenyltransferase                                                                | Metabolism                     |  |
| 2019 | N | Y | 99358  | fba              | 876  | 3  | 0.34 | N    | class II fructose-1,6-bisphosphate aldolase                                                            | Metabolism                     |  |
| 2019 | N | Y | 100528 | MBOVPG45_RS00435 | 573  | 3  | 0.52 | N    | nuclease                                                                                               | DNA repair                     |  |
| 2019 | N | Y | 107976 | MBOVPG45_RS00490 | 963  | 4  | 0.42 | N    | HPr kinase/phosphorylase                                                                               | Metabolism                     |  |
| 2019 | N | Y | 108881 | MBOVPG45_RS00495 | 984  | 4  | 0.41 | N    | prolipoprotein diacylglycerol transferase                                                              | Posttranslational modification |  |
| 2019 | N | Y | 110067 | MBOVPG45_RS00500 | 924  | 1  | 0.11 | N    | FAD-dependent oxidoreductase                                                                           | Metabolism                     |  |
| Both | Y | Y | 115075 | lpdA             | 1614 | 2  | 0.12 | N    | dihydrolipoyl dehydrogenase                                                                            | Metabolism                     |  |
| 2019 | N | Y | 129778 | MBOVPG45_RS00585 | 1218 | 1  | 0.08 | N    | YitT family protein                                                                                    | Stress protein                 |  |
| 2019 | N | Y | 132891 | MBOVPG45_RS00595 | 447  | 1  | 0.22 | N    | RpiB/LacA/LacB family sugar-phosphate isomerase                                                        | Metabolism                     |  |
| Both | Y | Y | 144605 | MBOVPG45_RS00650 | 2388 | 9  | 0.38 | N    | phosphoketolase family protein                                                                         | Metabolism                     |  |
| 2019 | N | Y | 146413 | pepF             | 1842 | 4  | 0.22 | N    | oligoendopeptidase F                                                                                   | Metabolism                     |  |
| 2019 | N | Y | 157477 | MBOVPG45_RS00705 | 1434 | 4  | 0.28 | N    | transposase                                                                                            | Transposable elements          |  |
|      |   |   |        |                  |      |    |      |      | bifunctional 5,10-methylenetetrahydrofolate dehydrogenase/5,10-methenyltetrahydrofolate cyclohydrolase | Metabolism                     |  |
| 2019 | N | Y | 170942 | MBOVPG45_RS00745 | 861  | 2  | 0.23 | N    | phosphate acetyltransferase                                                                            | Metabolism                     |  |
| 2019 | N | Y | 172051 | MBOVPG45_RS00750 | 957  | 4  | 0.42 | N    | phosphate acetyltransferase                                                                            | Metabolism                     |  |
| 2019 | N | Y | 173363 | MBOVPG45_RS00755 | 1194 | 2  | 0.17 | 2019 | acetate/propionate family kinase                                                                       | Metabolism                     |  |
| 2019 | N | Y | 174264 | MBOVPG45_RS00760 | 423  | 1  | 0.24 | N    | panetheine-phosphate adenyltransferase                                                                 | Metabolism                     |  |
| 2019 | N | Y | 174840 | MBOVPG45_RS00765 | 582  | 4  | 0.69 | N    | YihA family ribosome biogenesis GTP-binding protein                                                    | Metabolism                     |  |
| 2019 | N | Y | 178094 | pyk              | 1437 | 1  | 0.07 | N    | pyruvate kinase                                                                                        | Metabolism                     |  |
| Both | Y | Y | 183309 | MBOVPG45_RS00800 | 990  | 7  | 0.71 | N    | lactate dehydrogenase                                                                                  | Metabolism                     |  |
| 2019 | N | Y | 184839 | MBOVPG45_RS00805 | 801  | 6  | 0.75 | N    | alpha/beta hydrolase                                                                                   | Multi-role family              |  |
| 2019 | N | Y | 186667 | MBOVPG45_RS00810 | 1029 | 1  | 0.10 | N    | IS30 family transposase                                                                                | Transposable elements          |  |
| 2019 | N | Y | 201195 | MBOVPG45_RS00870 | 2307 | 13 | 0.56 | 2019 | S8 family serine peptidase                                                                             | Peptidase                      |  |
| 2019 | N | Y | 218020 | MBOVPG45_RS00935 | 453  | 3  | 0.66 | 2019 | SocA family protein                                                                                    | Transport protein              |  |
| 2019 | N | Y | 222893 | MBOVPG45_RS00955 | 1029 | 1  | 0.10 | N    | IS30-like element ISMbov1 family transposase                                                           | Transposable elements          |  |
| 2019 | N | Y | 224139 | MBOVPG45_RS00960 | 1413 | 1  | 0.07 | N    | IS1634-like element ISMbov2 family transposase                                                         | Transposable elements          |  |
| 2019 | N | Y | 230209 | MBOVPG45_RS00975 | 1434 | 2  | 0.14 | N    | transposase                                                                                            | Transposable elements          |  |
| 2019 | N | Y | 252748 | MBOVPG45_RS01085 | 1017 | 1  | 0.10 | N    | IS30 family transposase                                                                                | Transposable elements          |  |
| 2019 | N | Y | 256515 | pgk              | 1185 | 2  | 0.17 | N    | phosphoglycerate kinase                                                                                | Metabolism                     |  |
| 2019 | N | Y | 257653 | MBOVPG45_RS01110 | 1002 | 2  | 0.20 | N    | nicotinate phosphoribosyltransferase                                                                   | Metabolism                     |  |
| 2019 | N | Y | 269648 | MBOVPG45_RS01165 | 555  | 4  | 0.72 | N    | 5-formyltetrahydrofolate cyclo-ligase                                                                  | Metabolism                     |  |
| 2019 | N | Y | 273077 | MBOVPG45_RS01185 | 2679 | 33 | 1.23 | 2019 | type I restriction-modification system subunit M                                                       | Restriction enzyme             |  |
| Both | Y | Y | 275617 | MBOVPG45_RS04625 | 1158 | 6  | 0.52 | N    | restriction endonuclease subunit S                                                                     | Restriction enzyme             |  |
| 2019 | N | Y | 276761 | MBOVPG45_RS01195 | 3198 | 12 | 0.38 | 2019 | type I restriction endonuclease subunit R                                                              | Restriction enzyme             |  |
| 2019 | N | Y | 280080 | MBOVPG45_RS01200 | 921  | 1  | 0.11 | N    | site-specific integrase                                                                                | Recombination                  |  |
| 2019 | N | Y | 281463 | MBOVPG45_RS01205 | 1194 | 7  | 0.59 | N    | restriction endonuclease subunit S                                                                     | Restriction enzyme             |  |
| 2019 | N | Y | 282460 | MBOVPG45_RS01210 | 1245 | 2  | 0.16 | N    | IS3 family transposase                                                                                 | Transposable elements          |  |
| 2019 | N | Y | 299555 | MBOVPG45_RS01275 | 1086 | 6  | 0.55 | N    | M42 family metalloproteinase                                                                           | Metabolism                     |  |
| 2019 | N | Y | 302153 | recA             | 993  | 2  | 0.20 | N    | recombinase RecA                                                                                       | Recombination                  |  |
| 2019 | N | Y | 303010 | recU             | 492  | 1  | 0.20 | N    | Holliday junction resolvase RecU                                                                       | Recombination                  |  |
| 2019 | N | Y | 314969 | MBOVPG45_RS01405 | 993  | 7  | 0.70 | N    | histidine acid phosphatase                                                                             | Multi-role family              |  |
| 2019 | N | Y | 335706 | tpiA             | 783  | 2  | 0.26 | N    | triose-phosphate isomerase                                                                             | Metabolism                     |  |
| 2019 | N | Y | 336442 | deoC             | 669  | 4  | 0.60 | N    | deoxyribose-phosphate aldolase                                                                         | Metabolism                     |  |
| 2019 | N | Y | 337141 | MBOVPG45_RS01505 | 1296 | 2  | 0.15 | N    | pyrimidine-nucleoside phosphorylase                                                                    | Metabolism                     |  |
| 2019 | N | Y | 338666 | deoD             | 702  | 3  | 0.43 | N    | purine-nucleoside phosphorylase                                                                        | Metabolism                     |  |
| Both | Y | Y | 349035 | MBOVPG45_RS01555 | 2187 | 31 | 1.42 | N    | P80 family lipoprotein                                                                                 | Metabolism                     |  |
| 2019 | N | Y | 351154 | MBOVPG45_RS01560 | 1434 | 5  | 0.35 | N    | transposase                                                                                            | Transposable elements          |  |
| 2019 | N | Y | 353654 | MBOVPG45_RS01570 | 1716 | 6  | 0.35 | N    | GIY-YIG nuclease family protein                                                                        | Multi-role family              |  |
| 2019 | N | Y | 357311 | MBOVPG45_RS01585 | 837  | 2  | 0.24 | N    | deoxyribonuclease IV                                                                                   | DNA repair                     |  |
| Both | Y | Y | 358227 | MBOVPG45_RS01590 | 837  | 5  | 0.60 | N    | HAD hydrolase family protein                                                                           | Metabolism                     |  |

|      |   |   |        |                  |      |    |      |      |                                                                                            |                               |                                                                  |
|------|---|---|--------|------------------|------|----|------|------|--------------------------------------------------------------------------------------------|-------------------------------|------------------------------------------------------------------|
| 2019 | N | Y | 359126 | MBOVPG45_RS01595 | 1467 | 1  | 0.07 | N    | MFS transporter                                                                            | Transport protein             |                                                                  |
| 2019 | N | Y | 364058 | MBOVPG45_RS01610 | 1203 | 6  | 0.50 | N    | acetate/propionate family kinase                                                           | Metabolism                    |                                                                  |
| 2019 | N | Y | 365312 | MBOVPG45_RS01615 | 975  | 8  | 0.82 | N    | phosphate acetyltransferase                                                                | Metabolism                    |                                                                  |
| 2019 | N | Y | 369370 | MBOVPG45_RS01630 | 972  | 3  | 0.31 | N    | lactate dehydrogenase                                                                      | Metabolism                    |                                                                  |
| 2019 | N | Y | 370053 | MBOVPG45_RS01635 | 1245 | 4  | 0.32 | N    | malate transporter                                                                         | Metabolism                    |                                                                  |
| 2019 | N | Y | 373493 | MBOVPG45_RS01645 | 1572 | 7  | 0.45 | N    | glycosyltransferase family 2 protein                                                       | Metabolism                    |                                                                  |
| 2019 | N | Y | 374344 | MBOVPG45_RS01650 | 1434 | 6  | 0.42 | N    | transposase                                                                                | Transposable elements         |                                                                  |
| 2019 | N | Y | 376115 | MBOVPG45_RS01655 | 795  | 5  | 0.63 | 2019 | alpha/beta hydrolase                                                                       | Multi-role family             |                                                                  |
| 2019 | N | Y | 377305 | MBOVPG45_RS01660 | 732  | 1  | 0.14 | N    | nitroreductase                                                                             | Metabolism                    |                                                                  |
| 2019 | N | Y | 377784 | MBOVPG45_RS01665 | 1452 | 18 | 1.24 | N    | phosphotransferase                                                                         | Metabolism                    |                                                                  |
| 2019 | N | Y | 381462 | MBOVPG45_RS01675 | 759  | 2  | 0.26 | 2019 | phosphotransferase                                                                         | Metabolism                    |                                                                  |
| 2019 | N | Y | 397770 | MBOVPG45_RS01750 | 1572 | 6  | 0.38 | N    | phospho-sugar mutase                                                                       | Metabolism                    |                                                                  |
| 2019 | N | Y | 404108 | MBOVPG45_RS01780 | 2733 | 15 | 0.55 | N    | cation-transporting P-type ATPase                                                          | Transport protein             |                                                                  |
| 2019 | N | Y | 410113 | MBOVPG45_RS01815 | 1029 | 1  | 0.10 | N    | IS30-like element ISMbov1 family transposase                                               | Transposable elements         |                                                                  |
| 2019 | N | Y | 417290 | MBOVPG45_RS01845 | 1188 | 4  | 0.34 | N    | phosphopentomutase                                                                         | Metabolism                    |                                                                  |
| Both | Y | Y | 426836 | MBOVPG45_RS01870 | 2232 | 7  | 0.31 | N    | putative immunoglobulin-blocking virulence protein                                         | Virulence                     |                                                                  |
| 2019 | N | Y | 430161 | MBOVPG45_RS01875 | 2250 | 1  | 0.04 | N    | putative immunoglobulin-blocking virulence protein                                         | Virulence                     |                                                                  |
| Both | Y | Y | 449716 | MBOVPG45_RS01940 | 2205 | 4  | 0.18 | 2019 | UvrD-helicase domain-containing protein                                                    | DNA repair                    | Mutation increases error rate, increases chance for AMR mutation |
| 2019 | N | Y | 466370 | msrB             | 930  | 2  | 0.22 | N    | peptide-methionine (R)-S-oxide reductase MsrB                                              | Metabolism                    |                                                                  |
| Both | Y | Y | 466982 | MBOVPG45_RS02020 | 276  | 4  | 1.45 | 1982 | Smr/MutS family protein                                                                    | DNA repair, DNA recombination | Mutation increases error rate, increases chance for AMR mutation |
| 2019 | N | Y | 467471 | mutM             | 840  | 4  | 0.48 | N    | bifunctional DNA-formamidopyrimidine glycosylase/DNA-(apurinic or apyrimidinic site) lyase | DNA repair                    | Mutation increases error rate, increases chance for AMR mutation |
| 2019 | N | Y | 468171 | MBOVPG45_RS02030 | 1293 | 4  | 0.31 | N    | glucose-6-phosphate isomerase                                                              | Metabolism                    |                                                                  |
| 2019 | N | Y | 469380 | MBOVPG45_RS02035 | 1251 | 11 | 0.88 | N    | glucose-6-phosphate isomerase                                                              | Metabolism                    |                                                                  |
| 2019 | N | Y | 471148 | MBOVPG45_RS02045 | 1365 | 4  | 0.29 | N    | phosphopyruvate hydratase (eno)                                                            | Metabolism                    |                                                                  |
| 2019 | N | Y | 473268 | MBOVPG45_RS02050 | 1434 | 5  | 0.35 | N    | transposase                                                                                | Transposable elements         |                                                                  |
| 2019 | N | Y | 476136 | MBOVPG45_RS02060 | 1017 | 1  | 0.10 | N    | IS30 family transposase                                                                    | Transposable elements         |                                                                  |
| 2019 | N | Y | 488484 | MBOVPG45_RS02110 | 1302 | 1  | 0.08 | N    | ATP-binding protein                                                                        | Multi-role family             |                                                                  |
| 2019 | N | Y | 496543 | MBOVPG45_RS02130 | 945  | 8  | 0.85 | 2019 | variable surface lipoprotein                                                               | variable surface lipoprotein  |                                                                  |
| 2019 | N | Y | 497823 | MBOVPG45_RS02135 | 552  | 5  | 0.91 | N    | variable surface lipoprotein                                                               | variable surface lipoprotein  |                                                                  |
| 2019 | N | Y | 498724 | MBOVPG45_RS02140 | 1017 | 1  | 0.10 | N    | IS30 family transposase                                                                    | Transposable elements         |                                                                  |
| 2019 | N | Y | 501954 | MBOVPG45_RS02155 | 1434 | 3  | 0.21 | N    | transposase                                                                                | Transposable elements         |                                                                  |
| 2019 | N | Y | 507923 | MBOVPG45_RS02180 | 702  | 14 | 1.99 | N    | variable surface lipoprotein                                                               | variable surface lipoprotein  |                                                                  |
| 2019 | N | Y | 512844 | atpH             | 561  | 4  | 0.71 | N    | ATP synthase F1 subunit delta                                                              | ATP synthesis                 |                                                                  |
| 2019 | N | Y | 513447 | MBOVPG45_RS02215 | 1587 | 1  | 0.06 | N    | FOF1 ATP synthase subunit alpha                                                            | ATP synthesis                 |                                                                  |
| 1982 | Y | N | 515730 | MBOVPG45_RS02220 | 864  | 1  | 0.12 | N    | FOF1 ATP synthase subunit gamma                                                            | ATP synthesis                 |                                                                  |
| 2019 | N | Y | 517631 | MBOVPG45_RS02230 | 414  | 1  | 0.24 | N    | ATP synthase F1 subunit epsilon                                                            | ATP synthesis                 |                                                                  |
| 2019 | N | Y | 519897 | MBOVPG45_RS02245 | 717  | 1  | 0.14 | N    | glycerol-3-phosphate acyltransferase                                                       | Metabolism                    |                                                                  |
| Both | Y | Y | 521292 | lon              | 3132 | 5  | 0.16 | N    | endopeptidase La                                                                           | Metabolism                    |                                                                  |
| 2019 | N | Y | 528299 | MBOVPG45_RS02275 | 1947 | 9  | 0.46 | N    | M13 family metalloproteinase                                                               | Metabolism                    |                                                                  |
| 2019 | N | Y | 530918 | MBOVPG45_RS02285 | 378  | 5  | 1.32 | N    | glycine cleavage system protein H                                                          | Metabolism                    |                                                                  |
| 2019 | N | Y | 535888 | MBOVPG45_RS02310 | 669  | 1  | 0.15 | N    | TrkA family potassium uptake protein                                                       | Metabolism                    |                                                                  |
| 2019 | N | Y | 536751 | MBOVPG45_RS02315 | 1560 | 2  | 0.13 | N    | TrkH family potassium uptake protein                                                       | Metabolism                    |                                                                  |
| 2019 | N | Y | 540693 | uvrB             | 2010 | 9  | 0.45 | N    | excinuclease ABC subunit UvrB                                                              | DNA repair                    | Mutation increases error rate, increases chance for AMR mutation |



|      |   |   |        |                        |      |    |      |      |                                                                  |                               |                                                                  |
|------|---|---|--------|------------------------|------|----|------|------|------------------------------------------------------------------|-------------------------------|------------------------------------------------------------------|
| 2019 | N | Y | 542155 | uvrA                   | 2832 | 10 | 0.35 | N    | excinuclease ABC subunit UvrA                                    | DNA repair                    | Mutation increases error rate, increases chance for AMR mutation |
| Both | Y | Y | 557979 | MBOVPG45_RS02400       | 2826 | 3  | 0.11 | N    | conjugal transfer protein TraE                                   | Transformation                |                                                                  |
| 2019 | N | Y | 569339 | MBOVPG45_RS02455       | 1773 | 5  | 0.28 | N    | type IV secretory system conjugative DNA transfer family protein | Transformation                |                                                                  |
| Both | Y | Y | 575129 | MBOVPG45_RS02480       | 1602 | 4  | 0.25 | 1982 | IS1634-like element ISMbov3 family transposase                   | Transposable elements         |                                                                  |
| 2019 | N | Y | 577264 | MBOVPG45_RS02490       | 453  | 4  | 0.88 | 2019 | SocA family protein                                              | Transport protein             |                                                                  |
| 2019 | N | Y | 578011 | MBOVPG45_RS02495       | 723  | 1  | 0.14 | N    | SDR family oxidoreductase                                        | Metabolism                    |                                                                  |
| 2019 | N | Y | 582294 | ruvX                   | 441  | 1  | 0.23 | N    | Holliday junction resolvase RuvX                                 | Recombination                 |                                                                  |
| 2019 | N | Y | 586464 | MBOVPG45_RS02525       | 729  | 3  | 0.41 | N    | purine-nucleoside phosphorylase                                  | Metabolism                    |                                                                  |
| 2019 | N | Y | 591273 | MBOVPG45_RS02550       | 1050 | 6  | 0.57 | N    | zinc-dependent alcohol dehydrogenase                             | Metabolism                    |                                                                  |
| 2019 | N | Y | 592432 | MBOVPG45_RS02555       | 585  | 10 | 1.71 | 2019 | variable surface lipoprotein                                     | variable surface lipoprotein  |                                                                  |
| 2019 | N | Y | 593925 | MBOVPG45_RS02560       | 1041 | 1  | 0.10 | N    | zinc-dependent alcohol dehydrogenase                             | Metabolism                    |                                                                  |
| 2019 | N | Y | 594709 | MBOVPG45_RS02565       | 732  | 3  | 0.41 | N    | DNA processing protein DprA                                      | Transformation                |                                                                  |
| 2019 | N | Y | 595603 | MBOVPG45_RS02570       | 837  | 4  | 0.48 | N    | HAD family phosphatase                                           | Metabolism                    |                                                                  |
| 2019 | N | Y | 596888 | MBOVPG45_RS02575       | 1353 | 3  | 0.22 | N    | YitT family protein                                              | Stress protein                |                                                                  |
| 2019 | N | Y | 597675 | MBOVPG45_RS02580       | 2979 | 5  | 0.17 | N    | AAA family ATPase                                                | Multi-role family             |                                                                  |
| 2019 | N | Y | 609179 | glpK                   | 1509 | 3  | 0.20 | N    | glycerol kinase GlpK                                             | Metabolism                    |                                                                  |
| 2019 | N | Y | 615303 | MBOVPG45_RS02645       | 1671 | 2  | 0.12 | N    | APC family permease                                              | Transport protein             |                                                                  |
| 2019 | N | Y | 620753 | MBOVPG45_RS02665       | 1245 | 2  | 0.16 | N    | IS3 family transposase                                           | Transposable elements         |                                                                  |
| 2019 | N | Y | 633285 | MBOVPG45_RS02720       | 1356 | 1  | 0.07 | N    | lipoprotein ABC transporter substrate-binding protein            | Metabolism                    |                                                                  |
| 2019 | N | Y | 641833 | MBOVPG45_RS02750       | 1365 | 3  | 0.22 | N    | FAD-dependent oxidoreductase                                     | Metabolism                    |                                                                  |
| 2019 | N | Y | 647839 | MBOVPG45_RS02775       | 927  | 1  | 0.11 | N    | type II restriction endonuclease                                 | Restriction enzyme            |                                                                  |
| 2019 | N | Y | 648784 | MBOVPG45_RS02780       | 849  | 13 | 1.53 | N    | DNA adenine methylase                                            | DNA repair                    |                                                                  |
| Both | Y | Y | 650147 | MBOVPG45_RS02785       | 1374 | 24 | 1.75 | N    | variable surface lipoprotein                                     | variable surface lipoprotein  |                                                                  |
| 2019 | N | Y | 659437 | rnuC                   | 1440 | 1  | 0.07 | N    | DNA recombination protein RnuC                                   | Recombination                 |                                                                  |
| 2019 | N | Y | 659637 | MBOVPG45_RS02815       | 1611 | 2  | 0.12 | N    | dicarboxylate/amino acid:cation symporter                        | Metabolism                    |                                                                  |
| 1982 | Y | N | 662114 | MBOVPG45_RS02820       | 1350 | 1  | 0.07 | N    | FAD-dependent oxidoreductase                                     | Metabolism                    |                                                                  |
| 2019 | N | Y | 663026 | MBOVPG45_RS02825       | 1245 | 2  | 0.16 | N    | IS3 family transposase                                           | Transposable elements         |                                                                  |
| Both | Y | Y | 666001 | MBOVPG45_RS02835       | 900  | 4  | 0.44 | Both | variable surface lipoprotein                                     | variable surface lipoprotein  |                                                                  |
| 2019 | N | Y | 670440 | MBOVPG45_RS02860       | 1434 | 5  | 0.35 | N    | transposase                                                      | Transposable elements         |                                                                  |
| 2019 | N | Y | 677174 | MBOVPG45_RS02885       | 2001 | 4  | 0.20 | N    | DHH family phosphoesterase                                       | DNA repair, DNA recombination |                                                                  |
| 2019 | N | Y | 677990 | MBOVPG45_RS02890       | 1068 | 14 | 1.31 | N    | variable surface lipoprotein                                     | variable surface lipoprotein  |                                                                  |
| 2019 | N | Y | 679145 | MBOVPG45_RS02895       | 1602 | 3  | 0.19 | N    | IS1634 family transposase                                        | Transposable elements         |                                                                  |
| 2019 | N | Y | 693602 | ruvA                   | 597  | 2  | 0.34 | N    | Holliday junction branch migration protein RuvA                  | Recombination                 |                                                                  |
| 2019 | N | Y | 697337 | MBOVPG45_RS02990       | 711  | 4  | 0.56 | N    | signal peptidase II                                              | Cell signalling               |                                                                  |
| 2019 | N | Y | 704332 | MBOVPG45_RS03050       | 1245 | 2  | 0.16 | N    | IS3 family transposase                                           | Transposable elements         |                                                                  |
| 2019 | N | Y | 713717 | MBOVPG45_RS03080       | 2271 | 10 | 0.44 | N    | S8 family peptidase                                              | Peptidase                     |                                                                  |
| 2019 | N | Y | 716234 | MBOVPG45_RS03085       | 1044 | 1  | 0.10 | N    | AAA family ATPase                                                | Multi-role family             |                                                                  |
| 2019 | N | Y | 717489 | MBOVPG45_RS03090       | 1434 | 1  | 0.07 | N    | transposase                                                      | Transposable elements         |                                                                  |
| 2019 | N | Y | 719249 | MBOVPG45_RS03095       | 2226 | 7  | 0.31 | N    | AAA family ATPase                                                | Multi-role family             |                                                                  |
| Both | Y | Y | 733123 | ftsY                   | 1059 | 2  | 0.19 | N    | signal recognition particle-docking protein FtsY                 | Cell signalling               |                                                                  |
| 2019 | N | Y | 736512 | MBOVPG45_RS03185       | 336  | 2  | 0.60 | N    | HIT family protein                                               | Multi-role family             |                                                                  |
| 2019 | N | Y | 741395 | MBOVPG45_RS03210       | 555  | 1  | 0.18 | N    | inorganic diphosphatase                                          | Metabolism                    |                                                                  |
| 2019 | N | Y | 743052 | MBOVPG45_RS03215       | 1947 | 4  | 0.21 | N    | transketolase                                                    | Metabolism                    |                                                                  |
| 2019 | N | Y | 749051 | prs                    | 996  | 1  | 0.10 | N    | ribose-phosphate pyrophosphokinase                               | Metabolism                    |                                                                  |
| 2019 | N | Y | 749061 | rsmG (pseudogene), prs | 695  | 1  | 0.14 | N    | pseudogene                                                       | None                          |                                                                  |
| 2019 | N | Y | 751100 | MBOVPG45_RS03260       | 1029 | 4  | 0.39 | N    | IS30-like element ISMbov1 family transposase                     | Transposable elements         |                                                                  |
| Both | Y | Y | 753684 | MBOVPG45_RS03275       | 717  | 5  | 0.70 | N    | ribonuclease HIII                                                | Rnase                         |                                                                  |
| 2019 | N | Y | 756247 | MBOVPG45_RS03285       | 1602 | 4  | 0.25 | N    | IS1634-like element ISMbov3 family transposase                   | Transposable elements         |                                                                  |
| 2019 | N | Y | 762108 | MBOVPG45_RS03300       | 1398 | 3  | 0.21 | N    | CvpA family protein                                              | Toxin biosynthesis            |                                                                  |

|      |   |   |        |                  |      |    |      |      |                                                                    |                                |  |
|------|---|---|--------|------------------|------|----|------|------|--------------------------------------------------------------------|--------------------------------|--|
| Both | Y | Y | 772736 | MBOVPG45_RS03345 | 2316 | 25 | 1.08 | 1982 | S8 family serine peptidase                                         | Peptidase                      |  |
| 2019 | N | Y | 778219 | MBOVPG45_RS03365 | 1812 | 25 | 1.38 | 2019 | LppA family lipoprotein                                            | Metabolism                     |  |
| 2019 | N | Y | 780828 | MBOVPG45_RS03375 | 2310 | 9  | 0.39 | 2019 | S8 family serine peptidase                                         | Peptidase                      |  |
| 2019 | N | Y | 788183 | MBOVPG45_RS03390 | 918  | 4  | 0.44 | N    | 5'-3' exonuclease                                                  | DNA repair                     |  |
| 2019 | N | Y | 789498 | MBOVPG45_RS03395 | 1602 | 2  | 0.12 | N    | IS1634 family transposase                                          | Transposable elements          |  |
| 2019 | N | Y | 791109 | MBOVPG45_RS03400 | 2043 | 11 | 0.54 | N    | bifunctional metallophosphatase/5'-nucleotidase                    | DNA repair                     |  |
| 2019 | N | Y | 802899 | MBOVPG45_RS03450 | 1389 | 3  | 0.22 | N    | transposase                                                        | Transposable elements          |  |
| 2019 | N | Y | 810822 | MBOVPG45_RS03485 | 1089 | 10 | 0.92 | N    | M42 family peptidase                                               | Metabolism                     |  |
| 2019 | N | Y | 812080 | MBOVPG45_RS03490 | 1017 | 1  | 0.10 | N    | IS30 family transposase                                            | Transposable elements          |  |
| 2019 | N | Y | 839138 | MBOVPG45_RS03550 | 2169 | 5  | 0.23 | N    | AAA domain-containing protein                                      | Multi-role family              |  |
| 1982 | Y | N | 843830 | MBOVPG45_RS03560 | 1098 | 1  | 0.09 | N    | DNA adenine methylase                                              | DNA repair                     |  |
| 2019 | N | Y | 848393 | MBOVPG45_RS03590 | 2973 | 28 | 0.94 | N    | phosphoglucomutase                                                 | Metabolism                     |  |
| 2019 | N | Y | 851558 | ptsP             | 1713 | 7  | 0.41 | N    | phosphoenolpyruvate--protein phosphotransferase                    | Metabolism                     |  |
| 2019 | N | Y | 854531 | araD             | 732  | 1  | 0.14 | N    | L-ribulose-5-phosphate 4-epimerase                                 | Metabolism                     |  |
| 2019 | N | Y | 855274 | MBOVPG45_RS03615 | 885  | 4  | 0.45 | N    | L-ribulose-5-phosphate 3-epimerase                                 | Metabolism                     |  |
| 2019 | N | Y | 856260 | MBOVPG45_RS03620 | 654  | 3  | 0.46 | N    | 3-keto-L-gulonate-6-phosphate decarboxylase UlaD                   | Metabolism                     |  |
| 2019 | N | Y | 856957 | MBOVPG45_RS03625 | 489  | 1  | 0.20 | N    | PTS transporter subunit EIIA                                       | Transport protein              |  |
| 2019 | N | Y | 858957 | MBOVPG45_RS03635 | 1809 | 1  | 0.06 | N    | PTS ascorbate transporter subunit IIC                              | Transport protein              |  |
| 2019 | N | Y | 860078 | MBOVPG45_RS03640 | 1062 | 1  | 0.09 | N    | phosphotriesterase                                                 | Metabolism                     |  |
| 2019 | N | Y | 862854 | MBOVPG45_RS04565 | 168  | 5  | 2.98 | 2019 | variable surface lipoprotein                                       | variable surface lipoprotein   |  |
| Both | Y | Y | 864315 | MBOVPG45_RS03660 | 207  | 3  | 1.45 | 1982 | variable surface lipoprotein                                       | variable surface lipoprotein   |  |
| 2019 | N | Y | 864948 | MBOVPG45_RS03665 | 900  | 6  | 0.67 | N    | Fic family protein                                                 | Posttranslational modification |  |
| 2019 | N | Y | 866317 | MBOVPG45_RS04570 | 903  | 1  | 0.11 | N    | site-specific DNA-methyltransferase                                | Methylation                    |  |
| 2019 | N | Y | 867221 | MBOVPG45_RS04575 | 522  | 5  | 0.96 | 2019 | site-specific DNA-methyltransferase                                | Methylation                    |  |
| 2019 | N | Y | 870763 | MBOVPG45_RS03695 | 1017 | 1  | 0.10 | N    | IS30 family transposase                                            | Transposable elements          |  |
| 2019 | N | Y | 876432 | MBOVPG45_RS03720 | 2757 | 25 | 0.91 | N    | C1 family peptidase                                                | Metabolism                     |  |
| 2019 | N | Y | 879655 | MBOVPG45_RS03725 | 1008 | 2  | 0.20 | N    | ZIP family metal transporter                                       | Metabolism                     |  |
| 2019 | N | Y | 880921 | nadE             | 813  | 3  | 0.37 | N    | NAD(+) synthase                                                    | Metabolism                     |  |
| 2019 | N | Y | 882769 | MBOVPG45_RS03745 | 924  | 4  | 0.43 | N    | alpha/beta hydrolase                                               | Multi-role family              |  |
| 1982 | Y | N | 885156 | MBOVPG45_RS03755 | 900  | 1  | 0.11 | N    | ATP-binding protein                                                | Multi-role family              |  |
| 2019 | N | Y | 886043 | MBOVPG45_RS03760 | 1008 | 4  | 0.40 | N    | DNA damage-inducible protein DnaD                                  | DNA repair                     |  |
| Both | Y | Y | 887092 | MBOVPG45_RS03765 | 573  | 4  | 0.70 | N    | dephospho-CoA kinase                                               | Metabolism                     |  |
| 2019 | N | Y | 890617 | MBOVPG45_RS03795 | 1125 | 11 | 0.98 | 2019 | site-specific DNA-methyltransferase                                | Methylation                    |  |
| 2019 | N | Y | 891887 | MBOVPG45_RS03800 | 1284 | 8  | 0.62 | N    | MFS transporter                                                    | Transport protein              |  |
| 2019 | N | Y | 899288 | MBOVPG45_RS03835 | 654  | 1  | 0.15 | N    | chromate transporter                                               | Metabolism                     |  |
| 2019 | N | Y | 906851 | recR             | 588  | 3  | 0.51 | N    | recombination protein RecR                                         | Recombination                  |  |
| Both | Y | Y | 912118 | MBOVPG45_RS03905 | 1497 | 10 | 0.67 | N    | 2,3-bisphosphoglycerate-independent phosphoglycerate mutase        | Metabolism                     |  |
| 2019 | N | Y | 916526 | pgsA             | 609  | 2  | 0.33 | 2019 | CDP-diacylglycerol--glycerol-3-phosphate 3-phosphatidyltransferase | Metabolism                     |  |
| 2019 | N | Y | 917577 | MBOVPG45_RS03935 | 906  | 2  | 0.22 | N    | phosphatidate cytidyltransferase                                   | Metabolism                     |  |
| 2019 | N | Y | 928069 | MBOVPG45_RS03990 | 1029 | 1  | 0.10 | N    | IS30 family transposase                                            | Transposable elements          |  |
| Both | Y | Y | 930394 | MBOVPG45_RS04005 | 1092 | 2  | 0.18 | N    | variable surface lipoprotein                                       | variable surface lipoprotein   |  |
| Both | Y | Y | 931489 | MBOVPG45_RS04010 | 765  | 17 | 2.22 | 1982 | variable surface lipoprotein                                       | variable surface lipoprotein   |  |
| 2019 | N | Y | 939874 | MBOVPG45_RS04050 | 615  | 2  | 0.33 | N    | abortive infection protein                                         | Immune response                |  |
| 2019 | N | Y | 940364 | MBOVPG45_RS04055 | 861  | 4  | 0.46 | N    | nucleotidyl transferase AbiEii/AbiGii toxin family protein         | Toxin biosynthesis             |  |
| 2019 | N | Y | 942397 | MBOVPG45_RS04065 | 1017 | 1  | 0.10 | N    | IS30 family transposase                                            | Transposable elements          |  |
| Both | Y | Y | 945959 | MBOVPG45_RS04085 | 759  | 4  | 0.53 | 1982 | variable surface lipoprotein                                       | variable surface lipoprotein   |  |
| Both | Y | Y | 946967 | MBOVPG45_RS04090 | 609  | 7  | 1.15 | N    | variable surface lipoprotein                                       | variable surface lipoprotein   |  |
| 2019 | N | Y | 949632 | MBOVPG45_RS04110 | 1845 | 1  | 0.05 | N    | ribonuclease J                                                     | Rnase                          |  |



|      |   |   |         |                  |      |   |      |      |                                                |                                |  |
|------|---|---|---------|------------------|------|---|------|------|------------------------------------------------|--------------------------------|--|
| 2019 | N | Y | 959225  | MBOVPG45_RS04145 | 855  | 8 | 0.94 | N    | RluA family pseudouridine synthase             | Posttranslational modification |  |
| Both | Y | Y | 967387  | MBOVPG45_RS04200 | 1602 | 6 | 0.37 | 1982 | IS1634-like element ISMbov3 family transposase | Transposable elements          |  |
| 2019 | N | Y | 972044  | MBOVPG45_RS04230 | 234  | 1 | 0.43 | N    | acyl carrier protein                           | Metabolism                     |  |
| 2019 | N | Y | 976131  | MBOVPG45_RS04250 | 1422 | 5 | 0.35 | N    | YitT family protein                            | Stress protein                 |  |
| 2019 | N | Y | 978606  | MBOVPG45_RS04260 | 315  | 2 | 0.63 | N    | thioredoxin family protein                     | Metabolism                     |  |
| 2019 | N | Y | 981821  | MBOVPG45_RS04280 | 207  | 1 | 0.48 | 2019 | variable surface lipoprotein                   | variable surface lipoprotein   |  |
| Both | Y | Y | 984371  | MBOVPG45_RS04300 | 1245 | 2 | 0.16 | N    | IS3 family transposase                         | Transposable elements          |  |
| Both | Y | Y | 985381  | mgfA             | 2709 | 9 | 0.33 | N    | magnesium-translocating P-type ATPase          | Metabolism                     |  |
| Both | Y | Y | 997722  | hflB             | 2031 | 3 | 0.15 | N    | ATP-dependent zinc metalloprotease FtsH        | Membrane maintenance           |  |
| 2019 | N | Y | 1001054 | MBOVPG45_RS04335 | 2271 | 9 | 0.40 | N    | AAA family ATPase                              | Multi-role family              |  |
|      |   |   |         |                  |      |   |      |      |                                                |                                |  |

### S2-3. Uncharacterized Proteins:

| Strain | 1982<br>(Y/N) | 2019<br>(Y/N) | Ref Pos | Gene Name        | PG45<br>Gene size<br>(nt) | #Mutations | Mutations<br>/100 nt | Disrupted<br>(Y/N) | Gene Description                                   |                         |  |
|--------|---------------|---------------|---------|------------------|---------------------------|------------|----------------------|--------------------|----------------------------------------------------|-------------------------|--|
| Both   | Y             | Y             | 41706   | MBOVPG45_RS00190 | 9981                      | 5          | 0.05                 | 2019               | PDxFFG protein                                     | Uncharacterized protein |  |
| 2019   | N             | Y             | 60006   | MBOVPG45_RS00235 | 1035                      | 1          | 0.10                 | N                  | membrane protein                                   | Uncharacterized protein |  |
| 2019   | N             | Y             | 117143  | MBOVPG45_RS00540 | 546                       | 3          | 0.55                 | N                  | DJ-1/PfpI family protein                           | Uncharacterized protein |  |
| Both   | Y             | Y             | 141369  | MBOVPG45_RS00640 | 1818                      | 2          | 0.11                 | N                  | membrane protein                                   | Uncharacterized protein |  |
| 2019   | N             | Y             | 154022  | MBOVPG45_RS00690 | 1629                      | 12         | 0.74                 | 2019               | membrane protein                                   | Uncharacterized protein |  |
| Both   | Y             | Y             | 158505  | MBOVPG45_RS00710 | 741                       | 24         | 3.24                 | N                  | DUF285 domain-containing protein                   | Uncharacterized protein |  |
| Both   | Y             | Y             | 162561  | MBOVPG45_RS00725 | 1521                      | 17         | 1.12                 | Both               | DUF285 domain-containing protein                   | Uncharacterized protein |  |
| Both   | Y             | Y             | 164311  | MBOVPG45_RS00730 | 1521                      | 16         | 1.05                 | 2019               | DUF285 domain-containing protein                   | Uncharacterized protein |  |
| 2019   | N             | Y             | 182781  | MBOVPG45_RS00795 | 384                       | 3          | 0.78                 | N                  | membrane protein                                   | Uncharacterized protein |  |
| 2019   | N             | Y             | 283862  | MBOVPG45_RS01215 | 4713                      | 26         | 0.55                 | N                  | DUF4011 domain-containing protein                  | Uncharacterized protein |  |
| 2019   | N             | Y             | 313704  | MBOVPG45_RS01400 | 1056                      | 13         | 1.23                 | 2019               | Cof-type HAD-IIB family hydrolase                  | Uncharacterized protein |  |
| 2019   | N             | Y             | 339998  | MBOVPG45_RS01515 | 825                       | 2          | 0.24                 | N                  | Cof-type HAD-IIB family hydrolase                  | Uncharacterized protein |  |
| 2019   | N             | Y             | 356763  | MBOVPG45_RS01580 | 1707                      | 1          | 0.06                 | N                  | membrane protein                                   | Uncharacterized protein |  |
| 2019   | N             | Y             | 414758  | MBOVPG45_RS01835 | 1185                      | 24         | 2.03                 | N                  | DUF285 domain-containing protein                   | Uncharacterized protein |  |
| 2019   | N             | Y             | 455097  | MBOVPG45_RS01960 | 762                       | 1          | 0.13                 | N                  | membrane protein                                   | Uncharacterized protein |  |
| Both   | Y             | Y             | 493605  | MBOVPG45_RS02125 | 1989                      | 11         | 0.55                 | 1982               | BspA family leucine-rich repeat surface protein    | Uncharacterized protein |  |
| 2019   | N             | Y             | 545712  | MBOVPG45_RS02350 | 810                       | 5          | 0.62                 | N                  | DUF45 domain-containing protein                    | Uncharacterized protein |  |
| 2019   | N             | Y             | 561474  | MBOVPG45_RS02405 | 2238                      | 5          | 0.22                 | N                  | membrane protein                                   | Uncharacterized protein |  |
| 2019   | N             | Y             | 573609  | MBOVPG45_RS02470 | 1119                      | 10         | 0.89                 | N                  | BspA family leucine-rich repeat surface protein    | Uncharacterized protein |  |
| 2019   | N             | Y             | 587200  | MBOVPG45_RS02530 | 1524                      | 10         | 0.66                 | N                  | DUF285 domain-containing protein                   | Uncharacterized protein |  |
| 2019   | N             | Y             | 641166  | MBOVPG45_RS02745 | 786                       | 4          | 0.51                 | N                  | Nif3-like dinuclear metal center hexameric protein | Uncharacterized protein |  |
| 2019   | N             | Y             | 651781  | MBOVPG45_RS02795 | 2310                      | 9          | 0.39                 | 2019               | leucine-rich repeat domain-containing protein      | Uncharacterized protein |  |
| 2019   | N             | Y             | 654099  | MBOVPG45_RS02800 | 1839                      | 4          | 0.22                 | 2019               | leucine-rich repeat domain-containing protein      | Uncharacterized protein |  |
| 1982   | Y             | N             | 667694  | MBOVPG45_RS02845 | 909                       | 1          | 0.11                 | 1982               | BspA family leucine-rich repeat surface protein    | Uncharacterized protein |  |
| 1982   | Y             | N             | 690881  | MBOVPG45_RS02945 | 2367                      | 1          | 0.04                 | N                  | membrane protein                                   | Uncharacterized protein |  |
| 2019   | N             | Y             | 754547  | MBOVPG45_RS03280 | 930                       | 2          | 0.22                 | N                  | Cof-type HAD-IIB family hydrolase                  | Uncharacterized protein |  |
| Both   | Y             | Y             | 814940  | MBOVPG45_RS03500 | 8013                      | 58         | 0.72                 | 2019               | SGNH/GDSL hydrolase family protein                 | Uncharacterized protein |  |
| 2019   | N             | Y             | 833816  | MBOVPG45_RS03530 | 726                       | 5          | 0.69                 | N                  | leucine-rich repeat domain-containing protein      | Uncharacterized protein |  |
| 2019   | N             | Y             | 860963  | MBOVPG45_RS03645 | 858                       | 6          | 0.70                 | N                  | Cof-type HAD-IIB family hydrolase                  | Uncharacterized protein |  |
| 2019   | N             | Y             | 863158  | MBOVPG45_RS03655 | 999                       | 35         | 3.50                 | N                  | DUF285 domain-containing protein                   | Uncharacterized protein |  |
| 2019   | N             | Y             | 887599  | MBOVPG45_RS03770 | 381                       | 5          | 1.31                 | N                  | YigZ family protein                                | Uncharacterized protein |  |
| 2019   | N             | Y             | 896766  | MBOVPG45_RS03820 | 1059                      | 1          | 0.09                 | N                  | membrane protein                                   | Uncharacterized protein |  |
| 2019   | N             | Y             | 901081  | MBOVPG45_RS03850 | 612                       | 2          | 0.33                 | N                  | DUF402 domain-containing protein                   | Uncharacterized protein |  |
| 2019   | N             | Y             | 913679  | MBOVPG45_RS03910 | 900                       | 12         | 1.33                 | N                  | Cof-type HAD-IIB family hydrolase                  | Uncharacterized protein |  |
| 2019   | N             | Y             | 920884  | MBOVPG45_RS03955 | 303                       | 3          | 0.99                 | N                  | YlxR family protein                                | Uncharacterized protein |  |

|      |   |   |        |                  |      |    |      |      |                                   |                         |  |
|------|---|---|--------|------------------|------|----|------|------|-----------------------------------|-------------------------|--|
| 2019 | N | Y | 929129 | MBOVPG45_RS03995 | 1008 | 2  | 0.20 | N    | membrane protein                  | Uncharacterized protein |  |
| 2019 | N | Y | 954349 | MBOVPG45_RS04120 | 2418 | 10 | 0.41 | N    | DUF2779 domain-containing protein | Uncharacterized protein |  |
| Both | Y | Y | 980663 | MBOVPG45_RS04275 | 999  | 48 | 4.80 | 2019 | DUF285 domain-containing protein  | Uncharacterized protein |  |
|      |   |   |        |                  |      |    |      |      |                                   |                         |  |

#### S2-4. Hypothetical Proteins

| Strain | 1982<br>(Y/N) | 2019<br>(Y/N) | Ref Pos | Gene Name        | PG45<br>Gene size<br>(nt) | #Mutations | Mutations<br>/100 nt | Disrupted<br>(Y/N) | Gene Description     |                      |  |
|--------|---------------|---------------|---------|------------------|---------------------------|------------|----------------------|--------------------|----------------------|----------------------|--|
| 2019   | N             | Y             | 14976   | MBOVPG45_RS00085 | 453                       | 1          | 0.22                 | N                  | hypothetical protein | hypothetical protein |  |
| 2019   | N             | Y             | 30658   | MBOVPG45_RS00155 | 1422                      | 1          | 0.07                 | N                  | hypothetical protein | hypothetical protein |  |
| 2019   | N             | Y             | 65553   | MBOVPG45_RS00270 | 513                       | 2          | 0.39                 | N                  | hypothetical protein | hypothetical protein |  |
| 2019   | N             | Y             | 79432   | MBOVPG45_RS00340 | 765                       | 1          | 0.13                 | N                  | hypothetical protein | hypothetical protein |  |
| 2019   | N             | Y             | 97890   | MBOVPG45_RS00420 | 1194                      | 13         | 1.09                 | N                  | hypothetical protein | hypothetical protein |  |
| 2019   | N             | Y             | 99221   | MBOVPG45_RS00425 | 261                       | 2          | 0.77                 | N                  | hypothetical protein | hypothetical protein |  |
| 2019   | N             | Y             | 102344  | MBOVPG45_RS00450 | 459                       | 3          | 0.65                 | N                  | hypothetical protein | hypothetical protein |  |
| 2019   | N             | Y             | 104072  | MBOVPG45_RS00460 | 762                       | 16         | 2.10                 | N                  | hypothetical protein | hypothetical protein |  |
| 2019   | N             | Y             | 106274  | MBOVPG45_RS00475 | 234                       | 3          | 1.28                 | N                  | hypothetical protein | hypothetical protein |  |
| Both   | Y             | Y             | 107419  | MBOVPG45_RS00485 | 390                       | 5          | 1.28                 | N                  | hypothetical protein | hypothetical protein |  |
| 2019   | N             | Y             | 110917  | MBOVPG45_RS00505 | 690                       | 10         | 1.45                 | N                  | hypothetical protein | hypothetical protein |  |
| 2019   | N             | Y             | 118227  | MBOVPG45_RS00545 | 909                       | 1          | 0.11                 | N                  | hypothetical protein | hypothetical protein |  |
| Both   | Y             | Y             | 119112  | MBOVPG45_RS00550 | 2886                      | 48         | 1.66                 | N                  | hypothetical protein | hypothetical protein |  |
| Both   | Y             | Y             | 128082  | MBOVPG45_RS00575 | 984                       | 2          | 0.20                 | N                  | hypothetical protein | hypothetical protein |  |
| 2019   | N             | Y             | 132243  | MBOVPG45_RS00590 | 1941                      | 2          | 0.10                 | N                  | hypothetical protein | hypothetical protein |  |
| 1982   | Y             | N             | 156567  | MBOVPG45_RS00700 | 279                       | 1          | 0.36                 | N                  | hypothetical protein | hypothetical protein |  |
| 2019   | N             | Y             | 165866  | MBOVPG45_RS00735 | 2436                      | 6          | 0.25                 | N                  | hypothetical protein | hypothetical protein |  |
| 2019   | N             | Y             | 175241  | MBOVPG45_RS00770 | 1503                      | 22         | 1.46                 | N                  | hypothetical protein | hypothetical protein |  |
| 2019   | N             | Y             | 178282  | MBOVPG45_RS00780 | 981                       | 19         | 1.94                 | N                  | hypothetical protein | hypothetical protein |  |
| 2019   | N             | Y             | 185839  | MBOVPG45_RS04405 | 234                       | 5          | 2.14                 | N                  | hypothetical protein | hypothetical protein |  |
| 2019   | N             | Y             | 200561  | MBOVPG45_RS00865 | 1410                      | 2          | 0.14                 | N                  | hypothetical protein | hypothetical protein |  |
| 1982   | Y             | N             | 235507  | MBOVPG45_RS01005 | 990                       | 2          | 0.20                 | 1982               | hypothetical protein | hypothetical protein |  |
| 2019   | N             | Y             | 239758  | MBOVPG45_RS01020 | 306                       | 1          | 0.33                 | N                  | hypothetical protein | hypothetical protein |  |
| 2019   | N             | Y             | 241469  | MBOVPG45_RS01030 | 1521                      | 2          | 0.13                 | 2019               | hypothetical protein | hypothetical protein |  |
| 2019   | N             | Y             | 242137  | MBOVPG45_RS01035 | 660                       | 9          | 1.36                 | N                  | hypothetical protein | hypothetical protein |  |
| Both   | Y             | Y             | 242831  | MBOVPG45_RS01040 | 636                       | 7          | 1.10                 | 1982               | hypothetical protein | hypothetical protein |  |
| 2019   | N             | Y             | 253208  | MBOVPG45_RS01090 | 897                       | 1          | 0.11                 | N                  | hypothetical protein | hypothetical protein |  |
| 2019   | N             | Y             | 271059  | MBOVPG45_RS01175 | 480                       | 21         | 4.38                 | 2019               | hypothetical protein | hypothetical protein |  |
| 2019   | N             | Y             | 291937  | MBOVPG45_RS01225 | 1503                      | 7          | 0.47                 | N                  | hypothetical protein | hypothetical protein |  |
| 2019   | N             | Y             | 334428  | MBOVPG45_RS01490 | 1053                      | 18         | 1.71                 | N                  | hypothetical protein | hypothetical protein |  |
| 2019   | N             | Y             | 341776  | MBOVPG45_RS01525 | 1539                      | 9          | 0.58                 | N                  | hypothetical protein | hypothetical protein |  |
| 2019   | N             | Y             | 347859  | MBOVPG45_RS01550 | 1170                      | 6          | 0.51                 | N                  | hypothetical protein | hypothetical protein |  |
| 2019   | N             | Y             | 352974  | MBOVPG45_RS01565 | 405                       | 2          | 0.49                 | N                  | hypothetical protein | hypothetical protein |  |
| 2019   | N             | Y             | 361083  | MBOVPG45_RS01600 | 2238                      | 28         | 1.25                 | N                  | hypothetical protein | hypothetical protein |  |
| 2019   | N             | Y             | 363231  | MBOVPG45_RS01605 | 906                       | 5          | 0.55                 | N                  | hypothetical protein | hypothetical protein |  |
| 2019   | N             | Y             | 398393  | MBOVPG45_RS01755 | 888                       | 27         | 3.04                 | N                  | hypothetical protein | hypothetical protein |  |
| 2019   | N             | Y             | 399190  | MBOVPG45_RS01760 | 891                       | 22         | 2.47                 | N                  | hypothetical protein | hypothetical protein |  |
| Both   | Y             | Y             | 400121  | MBOVPG45_RS01765 | 1149                      | 35         | 3.05                 | 2019               | hypothetical protein | hypothetical protein |  |
| 2019   | N             | Y             | 418892  | MBOVPG45_RS01850 | 1248                      | 3          | 0.24                 | N                  | hypothetical protein | hypothetical protein |  |
| 2019   | N             | Y             | 424904  | MBOVPG45_RS01865 | 1171                      | 34         | 2.90                 | N                  | hypothetical protein | hypothetical protein |  |
| 2019   | N             | Y             | 433117  | MBOVPG45_RS01880 | 2571                      | 1          | 0.04                 | N                  | hypothetical protein | hypothetical protein |  |
| 2019   | N             | Y             | 434748  | MBOVPG45_RS01885 | 1512                      | 1          | 0.07                 | N                  | hypothetical protein | hypothetical protein |  |
| 2019   | N             | Y             | 437928  | MBOVPG45_RS01905 | 2244                      | 3          | 0.13                 | N                  | hypothetical protein | hypothetical protein |  |

|      |   |   |        |                  |      |    |      |      |                      |                      |  |
|------|---|---|--------|------------------|------|----|------|------|----------------------|----------------------|--|
| 2019 | N | Y | 443328 | MBOVPG45_RS01920 | 1071 | 2  | 0.19 | 2019 | hypothetical protein | hypothetical protein |  |
| 2019 | N | Y | 444935 | MBOVPG45_RS01925 | 2385 | 1  | 0.04 | N    | hypothetical protein | hypothetical protein |  |
| 1982 | Y | N | 447801 | MBOVPG45_RS01935 | 1647 | 1  | 0.06 | N    | hypothetical protein | hypothetical protein |  |
| 2019 | N | Y | 451398 | MBOVPG45_RS01945 | 669  | 2  | 0.30 | N    | hypothetical protein | hypothetical protein |  |
| 2019 | N | Y | 456260 | MBOVPG45_RS01970 | 579  | 1  | 0.17 | N    | hypothetical protein | hypothetical protein |  |
| Both | Y | Y | 463976 | MBOVPG45_RS02010 | 1944 | 38 | 1.95 | 2019 | hypothetical protein | hypothetical protein |  |
| 2019 | N | Y | 479290 | MBOVPG45_RS02080 | 1872 | 21 | 1.12 | N    | hypothetical protein | hypothetical protein |  |
| 2019 | N | Y | 491269 | MBOVPG45_RS02120 | 1725 | 17 | 0.99 | N    | hypothetical protein | hypothetical protein |  |
| Both | Y | Y | 500449 | MBOVPG45_RS02150 | 687  | 18 | 2.62 | N    | hypothetical protein | hypothetical protein |  |
| 2019 | N | Y | 503162 | MBOVPG45_RS02160 | 765  | 2  | 0.26 | N    | hypothetical protein | hypothetical protein |  |
| 2019 | N | Y | 506905 | MBOVPG45_RS04420 | 441  | 4  | 0.91 | N    | hypothetical protein | hypothetical protein |  |
| 2019 | N | Y | 508825 | MBOVPG45_RS02185 | 1674 | 21 | 1.25 | N    | hypothetical protein | hypothetical protein |  |
| 2019 | N | Y | 510784 | MBOVPG45_RS02190 | 471  | 4  | 0.85 | 2019 | hypothetical protein | hypothetical protein |  |
| 2019 | N | Y | 526035 | MBOVPG45_RS02260 | 729  | 9  | 1.23 | N    | hypothetical protein | hypothetical protein |  |
| Both | Y | Y | 532709 | MBOVPG45_RS02295 | 1218 | 5  | 0.41 | N    | hypothetical protein | hypothetical protein |  |
| 2019 | N | Y | 538024 | MBOVPG45_RS02320 | 453  | 1  | 0.22 | N    | hypothetical protein | hypothetical protein |  |
| 2019 | N | Y | 551171 | MBOVPG45_RS02380 | 1233 | 1  | 0.08 | N    | hypothetical protein | hypothetical protein |  |
| 2019 | N | Y | 552200 | MBOVPG45_RS02385 | 645  | 1  | 0.16 | N    | hypothetical protein | hypothetical protein |  |
| 2019 | N | Y | 553973 | MBOVPG45_RS02390 | 4548 | 27 | 0.59 | N    | hypothetical protein | hypothetical protein |  |
| 2019 | N | Y | 557345 | MBOVPG45_RS02395 | 588  | 4  | 0.68 | N    | hypothetical protein | hypothetical protein |  |
| 2019 | N | Y | 563125 | MBOVPG45_RS02410 | 306  | 1  | 0.33 | N    | hypothetical protein | hypothetical protein |  |
| 2019 | N | Y | 564824 | MBOVPG45_RS02420 | 1509 | 2  | 0.13 | 2019 | hypothetical protein | hypothetical protein |  |
| 2019 | N | Y | 565492 | MBOVPG45_RS02425 | 660  | 8  | 1.21 | N    | hypothetical protein | hypothetical protein |  |
| 2019 | N | Y | 566186 | MBOVPG45_RS02430 | 663  | 5  | 0.75 | N    | hypothetical protein | hypothetical protein |  |
| 2019 | N | Y | 567250 | MBOVPG45_RS02440 | 267  | 6  | 2.25 | 2019 | hypothetical protein | hypothetical protein |  |
| 2019 | N | Y | 567514 | MBOVPG45_RS02445 | 852  | 3  | 0.35 | N    | hypothetical protein | hypothetical protein |  |
| 2019 | N | Y | 570980 | MBOVPG45_RS02460 | 1362 | 10 | 0.73 | N    | hypothetical protein | hypothetical protein |  |
| 2019 | N | Y | 572379 | MBOVPG45_RS04635 | 153  | 6  | 3.92 | 2019 | hypothetical protein | hypothetical protein |  |
| 2019 | N | Y | 576731 | MBOVPG45_RS02485 | 390  | 3  | 0.77 | 2019 | hypothetical protein | hypothetical protein |  |
| Both | Y | Y | 578792 | MBOVPG45_RS02500 | 2172 | 37 | 1.70 | N    | hypothetical protein | hypothetical protein |  |
| 2019 | N | Y | 581268 | MBOVPG45_RS02505 | 729  | 7  | 0.96 | N    | hypothetical protein | hypothetical protein |  |
| 2019 | N | Y | 634259 | MBOVPG45_RS02725 | 1791 | 19 | 1.06 | N    | hypothetical protein | hypothetical protein |  |
| 2019 | N | Y | 643726 | MBOVPG45_RS02755 | 504  | 1  | 0.20 | N    | hypothetical protein | hypothetical protein |  |
| 2019 | N | Y | 651430 | MBOVPG45_RS02790 | 253  | 6  | 2.37 | 2019 | hypothetical protein | hypothetical protein |  |
| 2019 | N | Y | 669998 | MBOVPG45_RS02855 | 990  | 1  | 0.10 | N    | hypothetical protein | hypothetical protein |  |
| 2019 | N | Y | 681045 | MBOVPG45_RS02900 | 1170 | 34 | 2.91 | 2019 | hypothetical protein | hypothetical protein |  |
| 2019 | N | Y | 732728 | MBOVPG45_RS03155 | 285  | 1  | 0.35 | N    | hypothetical protein | hypothetical protein |  |
| 2019 | N | Y | 735556 | MBOVPG45_RS03180 | 699  | 11 | 1.57 | N    | hypothetical protein | hypothetical protein |  |
| 2019 | N | Y | 736781 | MBOVPG45_RS03190 | 1386 | 22 | 1.59 | N    | hypothetical protein | hypothetical protein |  |
| 2019 | N | Y | 738079 | MBOVPG45_RS03195 | 2175 | 26 | 1.20 | 2019 | hypothetical protein | hypothetical protein |  |
| 2019 | N | Y | 740336 | MBOVPG45_RS03200 | 588  | 4  | 0.68 | N    | hypothetical protein | hypothetical protein |  |
| 2019 | N | Y | 744092 | MBOVPG45_RS03220 | 945  | 7  | 0.74 | N    | hypothetical protein | hypothetical protein |  |
| 2019 | N | Y | 745757 | MBOVPG45_RS03225 | 717  | 27 | 3.77 | N    | hypothetical protein | hypothetical protein |  |
| 2019 | N | Y | 747240 | MBOVPG45_RS03230 | 717  | 23 | 3.21 | N    | hypothetical protein | hypothetical protein |  |
| 2019 | N | Y | 764720 | MBOVPG45_RS03315 | 1020 | 10 | 0.98 | 2019 | hypothetical protein | hypothetical protein |  |
| Both | Y | Y | 765831 | MBOVPG45_RS03320 | 1716 | 5  | 0.29 | N    | hypothetical protein | hypothetical protein |  |
| 2019 | N | Y | 774671 | MBOVPG45_RS03350 | 1332 | 11 | 0.83 | N    | hypothetical protein | hypothetical protein |  |
| 2019 | N | Y | 776724 | MBOVPG45_RS03360 | 1434 | 13 | 0.91 | N    | hypothetical protein | hypothetical protein |  |
| 2019 | N | Y | 783151 | MBOVPG45_RS03380 | 1425 | 13 | 0.91 | N    | hypothetical protein | hypothetical protein |  |
| 2019 | N | Y | 796785 | MBOVPG45_RS03420 | 1218 | 6  | 0.49 | N    | hypothetical protein | hypothetical protein |  |
| 2019 | N | Y | 808377 | MBOVPG45_RS03475 | 1470 | 26 | 1.77 | 2019 | hypothetical protein | hypothetical protein |  |
| 2019 | N | Y | 831335 | MBOVPG45_RS03515 | 645  | 3  | 0.47 | N    | hypothetical protein | hypothetical protein |  |
| 2019 | N | Y | 835897 | MBOVPG45_RS03540 | 891  | 6  | 0.67 | 2019 | hypothetical protein | hypothetical protein |  |

|      |   |   |        |                  |      |    |      |      |                      |                      |  |
|------|---|---|--------|------------------|------|----|------|------|----------------------|----------------------|--|
| 2019 | N | Y | 854021 | MBOVPG45_RS03605 | 471  | 4  | 0.85 | N    | hypothetical protein | hypothetical protein |  |
| 2019 | N | Y | 861982 | MBOVPG45_RS03650 | 696  | 12 | 1.72 | 2019 | hypothetical protein | hypothetical protein |  |
| Both | Y | Y | 865893 | MBOVPG45_RS04450 | 372  | 3  | 0.81 | Both | hypothetical protein | hypothetical protein |  |
| 2019 | N | Y | 871183 | MBOVPG45_RS03700 | 1854 | 30 | 1.62 | N    | hypothetical protein | hypothetical protein |  |
| 2019 | N | Y | 881806 | MBOVPG45_RS03740 | 906  | 5  | 0.55 | N    | hypothetical protein | hypothetical protein |  |
| 2019 | N | Y | 911465 | MBOVPG45_RS03900 | 666  | 4  | 0.60 | N    | hypothetical protein | hypothetical protein |  |
| 2019 | N | Y | 914797 | MBOVPG45_RS03915 | 753  | 10 | 1.33 | N    | hypothetical protein | hypothetical protein |  |
| 2019 | N | Y | 915811 | MBOVPG45_RS03925 | 534  | 3  | 0.56 | N    | hypothetical protein | hypothetical protein |  |
| Both | Y | Y | 918202 | MBOVPG45_RS03940 | 657  | 3  | 0.46 | Both | hypothetical protein | hypothetical protein |  |
| Both | Y | Y | 934781 | MBOVPG45_RS04465 | 468  | 8  | 1.71 | 2019 | hypothetical protein | hypothetical protein |  |
| Both | Y | Y | 937718 | MBOVPG45_RS04470 | 1113 | 14 | 1.26 | 1982 | hypothetical protein | hypothetical protein |  |
| 2019 | N | Y | 943606 | MBOVPG45_RS04070 | 225  | 5  | 2.22 | 2019 | hypothetical protein | hypothetical protein |  |
| 2019 | N | Y | 955374 | MBOVPG45_RS04125 | 309  | 8  | 2.59 | N    | hypothetical protein | hypothetical protein |  |
